# Supplementary material for: Identifying Gastric Cancer Related Genes Using the Shortest Path Algorithm and Protein-Protein Interaction Network
Source: Hindawi journal article supplement (doi:10.1155/2014/371397), 2014-01-01
Supplement: f1 [file 371397.f1.pdf]

**Supplementary Material I.** 150 Gastric cancers related genes collected from Gastric Cancer Database, UniProtKB and TSGene Database

|         |          |         |
|---------|----------|---------|
| ADRM1   | FAM120A  | PIM3    |
| AKAP12  | FAM72D   | PIWIL1  |
| AKAP9   | FGFR2    | PLK1    |
| ANPEP   | FGFR3    | PLXNB1  |
| APC     | FGFR4    | PPHLN1  |
| ARID1A  | FLNC     | PQBP1   |
| ATM     | GKN2     | PRDM5   |
| AXL     | GRB7     | PRKAA2  |
| BACE2   | GSDMA    | PRSS1   |
| BIRC5   | HDAC1    | PSCA    |
| BMPR1A  | HMGB1    | PTPN23  |
| BMPR1B  | HNRPDL   | RARRES3 |
| BRD3    | HPGD     | ROS1    |
| BRDT    | INSR     | RPS6KA3 |
| BRSK1   | IRF1     | RRP7A   |
| CA9     | JAK3     | RTKN    |
| CAPRIN2 | JMJD6    | RUNX3   |
| CASC3   | KCMF1    | SAPCD2  |
| CASP10  | KIAA1524 | SDHB    |
| CASP8   | KISS1    | SDHD    |
| CASP9   | KLF6     | 1-Sep   |
| CCKBR   | KRAS     | SERF2   |
| CDC23   | LDHA     | SKI     |
| CDCA8   | LGALS3   | SLC5A8  |
| CDH1    | LOX      | SMAD2   |
| CDK12   | LXN      | SMAD3   |
| CENPW   | LZTS1    | SPEG    |
| CHFR    | MAP3K9   | STEAP4  |
| CIAO1   | MAPK14   | STK11   |
| CIB1    | MDM4     | TACC1   |
| CKAP2   | MET      | TAOK3   |
| CLU     | MICB     | TCF7L2  |
| COPA    | MINK1    | TCHP    |
| CTAG2   | MLH1     | TERT    |
| DLC1    | MSH2     | TFF1    |
| DLEC1   | MST4     | TGFBR2  |
| DMBT1   | MTAP     | TLK2    |
| DUS2L   | MUTYH    | TMEFF2  |
| EIF3D   | MYEOV    | TNK2    |
| EIF3K   | NAA15    | TP53    |
| EIF4E   | NDFIP1   | TRAF2   |

|       |        |        |
|-------|--------|--------|
| ELF3  | NEK6   | TRRAP  |
| EMCN  | NENF   | TTN    |
| ENO1  | NOL8   | UBAP1  |
| EPHA2 | NTRK3  | UBD    |
| EPHA8 | NUCB2  | VIM    |
| EPHB1 | OGG1   | WISP1  |
| EPHB2 | PDGFRB | WNT10B |
| EPHB4 | PDX1   | WWOX   |
| ERBB2 | PIK3CA | ZFHX3  |
