# Supplementary material for: Identifying Gastric Cancer Related Genes Using the Shortest Path Algorithm and Protein-Protein Interaction Network
Source: Hindawi journal article supplement (doi:10.1155/2014/371397), 2014-01-01
Supplement: f2 [file 371397.f2.pdf]

**Supplementary Material II.** 466 shortest path genes with betweenness greater than 0 and their permutation FDRs

| <b>Ensemble ID of shortest path genes</b> | <b>Gene name</b> | <b>Betweenness</b> | <b>Permutation FDR</b> |
|-------------------------------------------|------------------|--------------------|------------------------|
| ENSP00000245323                           | EFNB2            | 643                | 0                      |
| ENSP00000415151                           | CBFB             | 158                | 0                      |
| ENSP00000269601                           | TXNL4A           | 148                | 0                      |
| ENSP00000301411                           | NTF4             | 27                 | 0                      |
| ENSP00000313420                           | PRKDC            | 286                | 0.001                  |
| ENSP00000300305                           | RUNX1            | 224                | 0.002                  |
| ENSP00000338548                           | FGF1             | 304                | 0.003                  |
| ENSP00000265814                           | RUNX1T1          | 214                | 0.003                  |
| ENSP00000376849                           | CASP5            | 152                | 0.003                  |
| ENSP00000307298                           | FEM1B            | 40                 | 0.003                  |
| ENSP00000313950                           | AURKB            | 339                | 0.004                  |
| ENSP00000216911                           | AURKA            | 307                | 0.004                  |
| ENSP00000219172                           | CENPT            | 152                | 0.004                  |
| ENSP00000412553                           | ABCF1            | 152                | 0.004                  |
| ENSP00000388107                           | UBA52            | 561                | 0.005                  |
| ENSP00000222005                           | CDC37            | 304                | 0.005                  |
| ENSP00000352257                           | XRCC6            | 153                | 0.005                  |
| ENSP00000222482                           | CPA4             | 152                | 0.007                  |
| ENSP00000372975                           | HLA-C            | 152                | 0.007                  |

|                 |          |      |       |
|-----------------|----------|------|-------|
| ENSP00000234371 | KISS1R   | 151  | 0.007 |
| ENSP00000339723 | CIR1     | 151  | 0.007 |
| ENSP00000397297 | NTF3     | 125  | 0.007 |
| ENSP00000357392 | EFNA1    | 174  | 0.008 |
| ENSP00000239440 | ARAP3    | 152  | 0.008 |
| ENSP00000307004 | APLF     | 152  | 0.009 |
| ENSP00000355890 | EPRS     | 152  | 0.009 |
| ENSP00000358617 | PHTF1    | 2    | 0.009 |
| ENSP00000367207 | MYC      | 779  | 0.01  |
| ENSP00000229268 | USP5     | 152  | 0.01  |
| ENSP00000274026 | CCNA2    | 411  | 0.011 |
| ENSP00000253108 | EIF3G    | 151  | 0.012 |
| ENSP00000295926 | CCNL1    | 152  | 0.013 |
| ENSP00000338207 | LMO1     | 150  | 0.013 |
| ENSP00000240618 | KLRK1    | 303  | 0.014 |
| ENSP00000340691 | EIF4EBP1 | 235  | 0.014 |
| ENSP00000372815 | C4A      | 152  | 0.015 |
| ENSP00000373487 | KRT18    | 152  | 0.015 |
| ENSP00000350941 | SRC      | 1283 | 0.016 |
| ENSP00000206542 | OSGEP    | 152  | 0.016 |
| ENSP00000380460 | PLAA     | 112  | 0.016 |
| ENSP00000287156 | UBE2L6   | 152  | 0.017 |

|                 |         |     |       |
|-----------------|---------|-----|-------|
| ENSP00000269349 | EIF4A3  | 15  | 0.018 |
| ENSP00000171887 | TNS1    | 5   | 0.018 |
| ENSP00000341826 | HNRNPA1 | 152 | 0.019 |
| ENSP00000370719 | ITSN1   | 2   | 0.019 |
| ENSP00000227507 | CCND1   | 594 | 0.02  |
| ENSP00000362092 | RRAGC   | 152 | 0.021 |
| ENSP00000361366 | SFTPD   | 152 | 0.022 |
| ENSP00000310040 | EIF3F   | 150 | 0.022 |
| ENSP00000363019 | UBE2D1  | 61  | 0.022 |
| ENSP00000246551 | HCST    | 298 | 0.023 |
| ENSP00000216714 | APEX1   | 196 | 0.023 |
| ENSP00000351885 | PPP2R4  | 152 | 0.023 |
| ENSP00000227135 | SPA17   | 2   | 0.023 |
| ENSP00000324248 | PENK    | 1   | 0.023 |
| ENSP00000293308 | KRT8    | 152 | 0.024 |
| ENSP00000296695 | SPINK1  | 152 | 0.024 |
| ENSP00000377783 | PROS1   | 152 | 0.024 |
| ENSP00000356999 | USF1    | 152 | 0.026 |
| ENSP00000345530 | NEDD4   | 152 | 0.029 |
| ENSP00000327336 | BGN     | 1   | 0.029 |
| ENSP00000223215 | MEST    | 152 | 0.03  |
| ENSP00000281821 | EPHA4   | 302 | 0.031 |

|                 |         |     |       |
|-----------------|---------|-----|-------|
| ENSP00000264110 | ATF2    | 154 | 0.032 |
| ENSP00000247970 | PIN1    | 152 | 0.032 |
| ENSP00000321706 | GEMIN4  | 4   | 0.032 |
| ENSP00000343418 | SEMA4D  | 2   | 0.032 |
| ENSP00000265563 | PRKAR2A | 303 | 0.033 |
| ENSP00000379110 | CXCL1   | 107 | 0.033 |
| ENSP00000330341 | SOCS3   | 27  | 0.033 |
| ENSP00000306245 | FOS     | 318 | 0.035 |
| ENSP00000354280 | PRSS3   | 152 | 0.037 |
| ENSP00000228916 | SCNN1A  | 152 | 0.039 |
| ENSP00000269280 | NLRP1   | 152 | 0.04  |
| ENSP00000307863 | U2AF2   | 152 | 0.04  |
| ENSP00000357393 | EFNA3   | 111 | 0.041 |
| ENSP00000206249 | ESR1    | 982 | 0.043 |
| ENSP00000228850 | AKAP3   | 2   | 0.043 |
| ENSP00000396843 | NFIC    | 1   | 0.044 |
| ENSP00000310129 | PSMD2   | 152 | 0.045 |
| ENSP00000356248 | PTPN7   | 150 | 0.045 |
| ENSP00000339992 | MYB     | 303 | 0.046 |
| ENSP00000322542 | GTF2I   | 152 | 0.046 |
| ENSP00000341208 | STAT5A  | 17  | 0.046 |
| ENSP00000216455 | PSMA3   | 9   | 0.046 |

|                 |         |     |       |
|-----------------|---------|-----|-------|
| ENSP00000397323 | EHMT2   | 152 | 0.047 |
| ENSP00000296504 | SAP30   | 151 | 0.048 |
| ENSP00000305480 | FEN1    | 195 | 0.049 |
| ENSP00000361186 | TP53RK  | 152 | 0.049 |
| ENSP00000363826 | FZD8    | 152 | 0.049 |
| ENSP00000338983 | MUC1    | 147 | 0.05  |
| ENSP00000352272 | MYOZ1   | 152 | 0.051 |
| ENSP00000243611 | C4BPB   | 1   | 0.051 |
| ENSP00000356771 | F5      | 152 | 0.052 |
| ENSP00000379204 | BMP7    | 134 | 0.054 |
| ENSP00000360525 | MAGOH   | 137 | 0.055 |
| ENSP00000321999 | PTH1R   | 14  | 0.057 |
| ENSP00000252487 | TOMM40  | 2   | 0.057 |
| ENSP00000268712 | NCOR1   | 217 | 0.058 |
| ENSP00000308450 | CDC20   | 345 | 0.059 |
| ENSP00000255465 | CCNA1   | 194 | 0.059 |
| ENSP00000258418 | CAB39   | 152 | 0.06  |
| ENSP00000259633 | CD72    | 2   | 0.06  |
| ENSP00000217961 | STS     | 1   | 0.06  |
| ENSP00000312624 | TCAP    | 152 | 0.062 |
| ENSP00000354125 | EIF3B   | 151 | 0.062 |
| ENSP00000313829 | KHDRBS1 | 161 | 0.063 |

|                 |          |     |       |
|-----------------|----------|-----|-------|
| ENSP00000309871 | RACGAP1  | 66  | 0.063 |
| ENSP00000249923 | COPB1    | 152 | 0.064 |
| ENSP00000359818 | MMS19    | 152 | 0.064 |
| ENSP00000315615 | AKAP5    | 195 | 0.065 |
| ENSP00000329419 | COPB2    | 152 | 0.065 |
| ENSP00000372991 | LTA      | 1   | 0.065 |
| ENSP00000383199 | NEDD4L   | 152 | 0.066 |
| ENSP00000335153 | HSP90AA1 | 411 | 0.068 |
| ENSP00000304169 | PITX2    | 302 | 0.068 |
| ENSP00000381793 | GRB10    | 152 | 0.068 |
| ENSP00000369757 | RPS6     | 117 | 0.068 |
| ENSP00000370503 | CCM2     | 150 | 0.069 |
| ENSP00000308176 | BTK      | 152 | 0.07  |
| ENSP00000344668 | KRIT1    | 132 | 0.07  |
| ENSP00000306124 | PRKCE    | 152 | 0.072 |
| ENSP00000357177 | ARHGEF11 | 150 | 0.074 |
| ENSP00000319635 | CXCR2    | 107 | 0.074 |
| ENSP00000296509 | MAD2L1   | 152 | 0.075 |
| ENSP00000360141 | GNAS     | 152 | 0.075 |
| ENSP00000386165 | CEBPD    | 89  | 0.076 |
| ENSP00000189444 | NFKB2    | 15  | 0.078 |
| ENSP00000377446 | SUCLG1   | 302 | 0.08  |

|                 |         |     |       |
|-----------------|---------|-----|-------|
| ENSP00000368438 | PCNA    | 454 | 0.083 |
| ENSP00000357255 | BGLAP   | 2   | 0.083 |
| ENSP00000333001 | RBM8A   | 137 | 0.085 |
| ENSP00000265056 | MCM2    | 152 | 0.087 |
| ENSP00000343745 | DICER1  | 152 | 0.088 |
| ENSP00000340766 | SMG7    | 1   | 0.089 |
| ENSP00000352516 | DNMT1   | 169 | 0.093 |
| ENSP00000261349 | LRP6    | 302 | 0.094 |
| ENSP00000262887 | XRCC1   | 152 | 0.094 |
| ENSP00000372023 | CHEK2   | 276 | 0.095 |
| ENSP00000223029 | AIMP2   | 152 | 0.095 |
| ENSP00000370557 | MIS12   | 94  | 0.095 |
| ENSP00000297439 | DEFB1   | 149 | 0.096 |
| ENSP00000304350 | PRPF8   | 152 | 0.097 |
| ENSP00000301019 | CDT1    | 6   | 0.1   |
| ENSP00000301843 | CTTN    | 152 | 0.101 |
| ENSP00000306866 | GABARAP | 150 | 0.102 |
| ENSP00000298139 | WRN     | 147 | 0.102 |
| ENSP00000220592 | AGO2    | 152 | 0.103 |
| ENSP00000257904 | CDK4    | 101 | 0.104 |
| ENSP00000281453 | MLF1IP  | 3   | 0.104 |
| ENSP00000328777 | EFNA5   | 18  | 0.105 |

|                 |        |     |       |
|-----------------|--------|-----|-------|
| ENSP00000387699 | CREB1  | 540 | 0.106 |
| ENSP00000305422 | CEBPB  | 9   | 0.107 |
| ENSP00000364133 | TGFBR1 | 204 | 0.109 |
| ENSP00000410076 | CASP1  | 152 | 0.111 |
| ENSP00000348307 | SIRPA  | 63  | 0.116 |
| ENSP00000276682 | EIF3H  | 2   | 0.121 |
| ENSP00000244741 | CDKN1A | 267 | 0.123 |
| ENSP00000287727 | ZFYVE9 | 166 | 0.123 |
| ENSP00000357697 | S100A2 | 74  | 0.123 |
| ENSP00000276414 | GNRH1  | 151 | 0.124 |
| ENSP00000294339 | TAL1   | 150 | 0.124 |
| ENSP00000228872 | CDKN1B | 308 | 0.125 |
| ENSP00000276072 | TAF1   | 152 | 0.125 |
| ENSP00000366013 | GNB2L1 | 152 | 0.125 |
| ENSP00000229595 | ASF1A  | 152 | 0.127 |
| ENSP00000349547 | RASSF1 | 152 | 0.128 |
| ENSP00000309831 | SNUPN  | 147 | 0.132 |
| ENSP00000346440 | TCF4   | 33  | 0.132 |
| ENSP00000267843 | FGF7   | 15  | 0.133 |
| ENSP00000216160 | TAB1   | 39  | 0.135 |
| ENSP00000329357 | SP1    | 573 | 0.136 |
| ENSP00000273853 | CENPC1 | 124 | 0.136 |



|                 |         |     |       |
|-----------------|---------|-----|-------|
| ENSP00000339393 | CCR6    | 149 | 0.137 |
| ENSP00000365858 | GATA1   | 2   | 0.138 |
| ENSP00000403721 | CYP21A2 | 152 | 0.14  |
| ENSP00000355153 | CDKN2A  | 152 | 0.143 |
| ENSP00000264498 | FGF2    | 22  | 0.144 |
| ENSP00000228837 | FGF6    | 35  | 0.145 |
| ENSP00000262187 | RHEB    | 6   | 0.145 |
| ENSP00000282091 | PTH     | 151 | 0.147 |
| ENSP00000314151 | KLK3    | 152 | 0.148 |
| ENSP00000354927 | MAP3K3  | 18  | 0.148 |
| ENSP00000299402 | APBB1   | 3   | 0.148 |
| ENSP00000351671 | CCL20   | 149 | 0.149 |
| ENSP00000380921 | SH3KBP1 | 189 | 0.151 |
| ENSP00000366746 | STAM    | 4   | 0.151 |
| ENSP00000265421 | POLB    | 151 | 0.152 |
| ENSP00000354558 | MTOR    | 418 | 0.153 |
| ENSP00000336868 | CENPA   | 149 | 0.154 |
| ENSP00000258743 | IL6     | 214 | 0.155 |
| ENSP00000331358 | GAST    | 152 | 0.156 |
| ENSP00000363089 | TLR4    | 28  | 0.158 |
| ENSP00000315702 | MOB4    | 22  | 0.16  |
| ENSP00000363071 | DES     | 11  | 0.165 |

|                 |        |      |       |
|-----------------|--------|------|-------|
| ENSP00000285398 | ERCC3  | 152  | 0.166 |
| ENSP00000251849 | RAF1   | 320  | 0.171 |
| ENSP00000254122 | FSHB   | 1    | 0.171 |
| ENSP00000326804 | CUL1   | 74   | 0.172 |
| ENSP00000305651 | CXCL10 | 1    | 0.176 |
| ENSP00000280357 | IL18   | 158  | 0.178 |
| ENSP00000283147 | BMP6   | 2    | 0.178 |
| ENSP00000233156 | TFPI   | 1    | 0.18  |
| ENSP00000263621 | ELANE  | 2    | 0.183 |
| ENSP00000348786 | RAP1A  | 132  | 0.184 |
| ENSP00000252034 | ELN    | 152  | 0.186 |
| ENSP00000347858 | XIAP   | 29   | 0.194 |
| ENSP00000281950 | GEMIN6 | 7    | 0.194 |
| ENSP00000375777 | STRN4  | 21   | 0.195 |
| ENSP00000415941 | C4B    | 152  | 0.196 |
| ENSP00000262033 | PTGES3 | 2    | 0.198 |
| ENSP00000263253 | EP300  | 1554 | 0.199 |
| ENSP00000052754 | DCN    | 64   | 0.2   |
| ENSP00000267169 | DIABLO | 4    | 0.203 |
| ENSP00000306512 | IL8    | 119  | 0.207 |
| ENSP00000223129 | RPA3   | 47   | 0.209 |
| ENSP00000369050 | CYP1A1 | 151  | 0.212 |

|                 |         |      |       |
|-----------------|---------|------|-------|
| ENSP00000239223 | DUSP1   | 2    | 0.215 |
| ENSP00000309103 | BAD     | 270  | 0.216 |
| ENSP00000358716 | DDX20   | 151  | 0.217 |
| ENSP00000344456 | CTNNB1  | 1782 | 0.219 |
| ENSP00000356016 | CR1     | 151  | 0.221 |
| ENSP00000262965 | TCF3    | 26   | 0.221 |
| ENSP00000293288 | BAX     | 3    | 0.227 |
| ENSP00000364709 | F10     | 1    | 0.227 |
| ENSP00000348577 | RANGAP1 | 254  | 0.229 |
| ENSP00000363822 | AR      | 301  | 0.231 |
| ENSP00000346437 | ATG7    | 150  | 0.232 |
| ENSP00000254719 | RPA1    | 47   | 0.232 |
| ENSP00000224337 | BLNK    | 151  | 0.242 |
| ENSP00000227163 | SPI1    | 2    | 0.242 |
| ENSP00000391592 | PTPN6   | 155  | 0.246 |
| ENSP00000361066 | NCOA3   | 90   | 0.246 |
| ENSP00000358918 | SUFU    | 1    | 0.246 |
| ENSP00000242057 | AHR     | 76   | 0.247 |
| ENSP00000379213 | PTHLH   | 4    | 0.253 |
| ENSP00000259808 | RIPK1   | 143  | 0.256 |
| ENSP00000334122 | FGF3    | 50   | 0.259 |
| ENSP00000361405 | MMP9    | 85   | 0.261 |

|                 |          |     |       |
|-----------------|----------|-----|-------|
| ENSP00000332049 | CD86     | 17  | 0.261 |
| ENSP00000352514 | RUNX2    | 83  | 0.262 |
| ENSP00000379330 | NFATC2   | 32  | 0.266 |
| ENSP00000256443 | CDK7     | 130 | 0.275 |
| ENSP00000269321 | ARHGDI1A | 309 | 0.278 |
| ENSP00000351486 | NTRK1    | 98  | 0.278 |
| ENSP00000339527 | FOXO3    | 157 | 0.279 |
| ENSP00000331746 | CALCA    | 130 | 0.279 |
| ENSP00000288986 | NCK1     | 92  | 0.279 |
| ENSP00000264246 | CD80     | 10  | 0.279 |
| ENSP00000265734 | CDK6     | 4   | 0.279 |
| ENSP00000379625 | MYD88    | 29  | 0.282 |
| ENSP00000263025 | MAPK3    | 13  | 0.285 |
| ENSP00000276201 | UPF3B    | 16  | 0.286 |
| ENSP00000356832 | SGK1     | 152 | 0.288 |
| ENSP00000359424 | CHUK     | 77  | 0.288 |
| ENSP00000363970 | MAP1LC3A | 150 | 0.291 |
| ENSP00000302486 | MAP2K1   | 49  | 0.292 |
| ENSP00000268035 | IGF1R    | 111 | 0.294 |
| ENSP00000345571 | E2F1     | 160 | 0.296 |
| ENSP00000332643 | NDN      | 8   | 0.297 |
| ENSP00000085219 | CD22     | 1   | 0.297 |

|                 |         |     |       |
|-----------------|---------|-----|-------|
| ENSP00000285021 | XPC     | 2   | 0.298 |
| ENSP00000267996 | TPM1    | 152 | 0.301 |
| ENSP00000357879 | PSMD4   | 333 | 0.305 |
| ENSP00000374455 | SQSTM1  | 150 | 0.305 |
| ENSP00000262320 | AXIN1   | 146 | 0.306 |
| ENSP00000274335 | PIK3R1  | 64  | 0.307 |
| ENSP00000298171 | TSHR    | 1   | 0.307 |
| ENSP00000295731 | IHH     | 4   | 0.308 |
| ENSP00000227758 | BIRC2   | 4   | 0.31  |
| ENSP00000350720 | SMARCA4 | 152 | 0.311 |
| ENSP00000352561 | CALCR   | 130 | 0.313 |
| ENSP00000418447 | PPP2CA  | 171 | 0.315 |
| ENSP00000302530 | BUB1    | 44  | 0.315 |
| ENSP00000386259 | NEB     | 11  | 0.32  |
| ENSP00000324890 | CD28    | 27  | 0.328 |
| ENSP00000234071 | PROC    | 1   | 0.329 |
| ENSP00000263753 | SGOL1   | 169 | 0.333 |
| ENSP00000176195 | SCT     | 130 | 0.336 |
| ENSP00000296029 | PF4     | 1   | 0.337 |
| ENSP00000340944 | PTPN11  | 223 | 0.34  |
| ENSP00000355537 | ACTN2   | 143 | 0.34  |
| ENSP00000363055 | ZWINT   | 30  | 0.34  |

|                 |       |      |       |
|-----------------|-------|------|-------|
| ENSP00000231509 | NR3C1 | 54   | 0.341 |
| ENSP00000172229 | NGFR  | 8    | 0.342 |
| ENSP00000358595 | CGA   | 1    | 0.342 |
| ENSP00000400175 | RHOA  | 302  | 0.345 |
| ENSP00000310596 | LSM1  | 15   | 0.346 |
| ENSP00000222139 | EPOR  | 9    | 0.346 |
| ENSP00000354394 | STAT1 | 244  | 0.347 |
| ENSP00000210313 | PSMD5 | 70   | 0.348 |
| ENSP00000254227 | NR0B2 | 152  | 0.349 |
| ENSP00000367830 | PRKCZ | 5    | 0.359 |
| ENSP00000262803 | UPF1  | 1    | 0.359 |
| ENSP00000257408 | KLB   | 2    | 0.364 |
| ENSP00000304895 | IRS1  | 349  | 0.367 |
| ENSP00000237837 | FGF23 | 3    | 0.368 |
| ENSP00000298316 | ARF6  | 152  | 0.369 |
| ENSP00000284981 | APP   | 453  | 0.371 |
| ENSP00000380280 | FGFR1 | 222  | 0.374 |
| ENSP00000358997 | IRAK1 | 51   | 0.374 |
| ENSP00000266079 | PRPF6 | 2    | 0.377 |
| ENSP00000245907 | C3    | 151  | 0.378 |
| ENSP00000339007 | GRB2  | 1365 | 0.38  |
| ENSP00000362795 | CXCR3 | 1    | 0.381 |

|                 |        |     |       |
|-----------------|--------|-----|-------|
| ENSP00000356713 | IFNGR1 | 21  | 0.387 |
| ENSP00000263341 | IL1B   | 80  | 0.388 |
| ENSP00000209728 | CDC6   | 105 | 0.39  |
| ENSP00000311032 | CASP3  | 7   | 0.401 |
| ENSP00000299293 | FRS2   | 137 | 0.404 |
| ENSP00000350708 | RAD23B | 2   | 0.404 |
| ENSP00000361359 | CD40   | 11  | 0.405 |
| ENSP00000294172 | NXF1   | 136 | 0.409 |
| ENSP00000309845 | HRAS   | 212 | 0.414 |
| ENSP00000352400 | NUP214 | 136 | 0.422 |
| ENSP00000256592 | TSHB   | 1   | 0.422 |
| ENSP00000356024 | CR2    | 151 | 0.425 |
| ENSP00000274255 | SKP2   | 42  | 0.427 |
| ENSP00000216797 | NFKBIA | 150 | 0.432 |
| ENSP00000354621 | SMURF1 | 7   | 0.433 |
| ENSP00000332353 | PTCH1  | 2   | 0.434 |
| ENSP00000356438 | PTGS2  | 152 | 0.44  |
| ENSP00000384675 | SOS1   | 119 | 0.441 |
| ENSP00000326366 | PSEN1  | 447 | 0.444 |
| ENSP00000262367 | CREBBP | 283 | 0.444 |
| ENSP00000353483 | MAPK8  | 390 | 0.446 |
| ENSP00000256897 | CCNH   | 20  | 0.447 |

|                 |        |      |       |
|-----------------|--------|------|-------|
| ENSP00000329380 | GP1BA  | 150  | 0.449 |
| ENSP00000300161 | YWHAB  | 4    | 0.451 |
| ENSP00000351407 | ARNT   | 74   | 0.457 |
| ENSP00000177694 | TBX21  | 10   | 0.457 |
| ENSP00000287598 | BUB1B  | 80   | 0.458 |
| ENSP00000215832 | MAPK1  | 333  | 0.463 |
| ENSP00000321656 | CDC25C | 383  | 0.465 |
| ENSP00000396127 | RAN    | 262  | 0.466 |
| ENSP00000256442 | CCNB1  | 77   | 0.469 |
| ENSP00000268182 | IQGAP1 | 216  | 0.47  |
| ENSP00000348708 | UPF2   | 15   | 0.47  |
| ENSP00000270202 | AKT1   | 1179 | 0.472 |
| ENSP00000266970 | CDK2   | 166  | 0.479 |
| ENSP00000320940 | NCOA1  | 35   | 0.479 |
| ENSP00000264554 | SHC2   | 5    | 0.481 |
| ENSP00000340330 | KAT5   | 62   | 0.483 |
| ENSP00000277120 | NTRK2  | 46   | 0.483 |
| ENSP00000338018 | HIF1A  | 480  | 0.491 |
| ENSP00000324806 | GSK3B  | 505  | 0.492 |
| ENSP00000221972 | CD79A  | 1    | 0.492 |
| ENSP00000230354 | TBP    | 424  | 0.495 |
| ENSP00000309503 | YWHAZ  | 171  | 0.495 |



|                 |         |     |       |
|-----------------|---------|-----|-------|
| ENSP00000387662 | GCG     | 289 | 0.496 |
| ENSP00000310491 | ARHGAP1 | 24  | 0.5   |
| ENSP00000361275 | PLK3    | 147 | 0.507 |
| ENSP00000371138 | FKBP1A  | 75  | 0.51  |
| ENSP00000293272 | CCL5    | 41  | 0.511 |
| ENSP00000267859 | BNIP2   | 91  | 0.521 |
| ENSP00000378332 | TGFB1I1 | 3   | 0.523 |
| ENSP00000354586 | GLI2    | 1   | 0.523 |
| ENSP00000262158 | SMAD7   | 14  | 0.525 |
| ENSP00000313419 | CD19    | 151 | 0.526 |
| ENSP00000308541 | F2      | 150 | 0.526 |
| ENSP00000211998 | VCL     | 148 | 0.529 |
| ENSP00000365016 | IRS2    | 7   | 0.531 |
| ENSP00000301838 | FADD    | 9   | 0.537 |
| ENSP00000353059 | APAF1   | 124 | 0.539 |
| ENSP00000324897 | UBE2I   | 230 | 0.544 |
| ENSP00000245451 | BMP4    | 9   | 0.545 |
| ENSP00000342793 | PLD1    | 152 | 0.551 |
| ENSP00000229135 | IFNG    | 116 | 0.556 |
| ENSP00000321797 | FGF8    | 26  | 0.561 |
| ENSP00000278916 | CHEK1   | 155 | 0.564 |
| ENSP00000302269 | VAV1    | 174 | 0.567 |

|                 |           |     |       |
|-----------------|-----------|-----|-------|
| ENSP00000269485 | TNFRSF11A | 1   | 0.567 |
| ENSP00000302160 | LSM3      | 2   | 0.57  |
| ENSP00000368104 | BMP2      | 7   | 0.572 |
| ENSP00000340858 | B2M       | 12  | 0.573 |
| ENSP00000358622 | IKBKG     | 27  | 0.578 |
| ENSP00000302150 | PRL       | 133 | 0.58  |
| ENSP00000384273 | RELA      | 285 | 0.584 |
| ENSP00000371432 | PRLR      | 133 | 0.586 |
| ENSP00000330393 | LEPR      | 12  | 0.613 |
| ENSP00000360683 | PTPN1     | 57  | 0.614 |
| ENSP00000318297 | RUVBL1    | 3   | 0.616 |
| ENSP00000329623 | BCL2      | 514 | 0.623 |
| ENSP00000305769 | SMAD1     | 149 | 0.624 |
| ENSP00000267163 | RB1       | 159 | 0.625 |
| ENSP00000356425 | UCHL5     | 86  | 0.625 |
| ENSP00000302967 | HDAC3     | 4   | 0.628 |
| ENSP00000262238 | YY1       | 4   | 0.639 |
| ENSP00000219476 | TSC2      | 41  | 0.655 |
| ENSP00000348986 | INS-IGF2  | 225 | 0.656 |
| ENSP00000274376 | RASA1     | 10  | 0.658 |
| ENSP00000241014 | MAPK8IP1  | 1   | 0.663 |
| ENSP00000309597 | MAP3K11   | 1   | 0.665 |

|                 |        |     |       |
|-----------------|--------|-----|-------|
| ENSP00000250003 | MYOD1  | 26  | 0.669 |
| ENSP00000371067 | JAK2   | 236 | 0.672 |
| ENSP00000364898 | SYK    | 20  | 0.676 |
| ENSP00000297261 | SHH    | 2   | 0.682 |
| ENSP00000223023 | WASL   | 106 | 0.684 |
| ENSP00000278568 | PAK1   | 34  | 0.684 |
| ENSP00000279593 | GRIN2B | 144 | 0.685 |
| ENSP00000304903 | CD2BP2 | 299 | 0.688 |
| ENSP00000212015 | SIRT1  | 81  | 0.69  |
| ENSP00000264972 | ZAP70  | 6   | 0.69  |
| ENSP00000348461 | RAC1   | 612 | 0.692 |
| ENSP00000264657 | STAT3  | 950 | 0.694 |
| ENSP00000292303 | CCR5   | 41  | 0.698 |
| ENSP00000263923 | KDR    | 9   | 0.702 |
| ENSP00000314458 | CDC42  | 349 | 0.703 |
| ENSP00000312652 | LEP    | 286 | 0.709 |
| ENSP00000341551 | SMAD4  | 158 | 0.71  |
| ENSP00000344352 | ATF3   | 79  | 0.712 |
| ENSP00000376076 | SUMO1  | 32  | 0.712 |
| ENSP00000341189 | PTK2   | 185 | 0.717 |
| ENSP00000338799 | IL6ST  | 17  | 0.719 |
| ENSP00000284384 | PRKCA  | 1   | 0.723 |

|                 |          |      |       |
|-----------------|----------|------|-------|
| ENSP00000358490 | CD2      | 299  | 0.734 |
| ENSP00000252622 | LSM7     | 13   | 0.735 |
| ENSP00000401303 | SHC1     | 169  | 0.745 |
| ENSP00000244007 | PLCG1    | 90   | 0.749 |
| ENSP00000360266 | JUN      | 146  | 0.775 |
| ENSP00000249636 | PIAS1    | 12   | 0.776 |
| ENSP00000221930 | TGFB1    | 67   | 0.782 |
| ENSP00000215829 | SNRPD3   | 19   | 0.787 |
| ENSP00000350283 | BRCA1    | 186  | 0.789 |
| ENSP00000275493 | EGFR     | 1030 | 0.79  |
| ENSP00000312995 | CLSPN    | 33   | 0.81  |
| ENSP00000364893 | ARHGEF7  | 48   | 0.818 |
| ENSP00000162749 | TNFRSF1A | 5    | 0.823 |
| ENSP00000222254 | PIK3R2   | 2    | 0.823 |
| ENSP00000361125 | VEGFA    | 9    | 0.826 |
| ENSP00000359206 | BTRC     | 83   | 0.827 |
| ENSP00000264033 | CBL      | 299  | 0.832 |
| ENSP00000355865 | PARK2    | 152  | 0.845 |
| ENSP00000258682 | CAMK2B   | 81   | 0.845 |
| ENSP00000399968 | NCOA2    | 21   | 0.847 |
| ENSP00000365891 | WAS      | 10   | 0.847 |
| ENSP00000011653 | CD4      | 55   | 0.848 |

|                 |          |      |       |
|-----------------|----------|------|-------|
| ENSP00000343204 | JAK1     | 7    | 0.85  |
| ENSP00000283635 | CD8A     | 15   | 0.876 |
| ENSP00000361626 | YBX1     | 151  | 0.888 |
| ENSP00000283195 | RANBP2   | 8    | 0.894 |
| ENSP00000337825 | LCK      | 324  | 0.897 |
| ENSP00000221494 | SF3A2    | 315  | 0.898 |
| ENSP00000339151 | IKBKB    | 5    | 0.908 |
| ENSP00000363676 | RPL11    | 117  | 0.913 |
| ENSP00000340820 | MAPT     | 1    | 0.922 |
| ENSP00000226574 | NFKB1    | 12   | 0.926 |
| ENSP00000046794 | LCP2     | 184  | 0.929 |
| ENSP00000344818 | UBC      | 1204 | 0.931 |
| ENSP00000226730 | IL2      | 136  | 0.942 |
| ENSP00000346300 | CRKL     | 4    | 0.948 |
| ENSP00000265171 | EGF      | 2    | 0.948 |
| ENSP00000361021 | PTEN     | 76   | 0.951 |
| ENSP00000162330 | BCAR1    | 19   | 0.953 |
| ENSP00000400591 | SNRPE    | 1    | 0.956 |
| ENSP00000378338 | GIT1     | 3    | 0.967 |
| ENSP00000338345 | SNCA     | 3    | 0.969 |
| ENSP00000262613 | SLC9A3R1 | 14   | 0.971 |
| ENSP00000299421 | ILK      | 9    | 0.973 |

|                 |       |     |       |
|-----------------|-------|-----|-------|
| ENSP00000357656 | FYN   | 64  | 0.979 |
| ENSP00000228307 | PXN   | 44  | 0.982 |
| ENSP00000417281 | MDM2  | 375 | 0.985 |
| ENSP00000356346 | PTPRC | 15  | 0.993 |
| ENSP00000300574 | CRK   | 6   | 0.993 |
| ENSP00000380227 | ITGA4 | 2   | 0.995 |
| ENSP00000346839 | FN1   | 2   | 0.997 |
