# Supplementary material for: Identifying Gastric Cancer Related Genes Using the Shortest Path Algorithm and Protein-Protein Interaction Network
Source: Biomed Res Int. 2014 Mar 5;2014:371397. doi: 10.1155/2014/371397 (PMC3963223; doi:10.1155/2014/371397)
Supplement: Supplementary file 3 [file 371397.f3.xlsx]

## Sheet: Sheet1
Supplementary Material III. GO enrichment results of 144 genes
Category	Term	Count	Percentage	P-value	Genes	List Total	Pop Hits	Pop Total	Fold Enrichment	Bonferroni	Benjamini	FDR
GOTERM_CC_FAT	GO:0005654~nucleoplasm	30	20.8333	1.15685e-09	MMS19, XRCC6, PRKDC, NFKB2, CHEK2, XRCC1, CDT1, FOS, SAP30, CIR1, RBM8A, PRPF8, UBE2D1, CCNA2, MYC, APEX1, GEMIN4, PITX2, BGLAP, MAGOH, CCNL1, CDC20, MCM2, USF1, HNRNPA1, EIF4A3, CCND1, PCNA, NCOR1, UBA52	119	882	12782	3.65346	2.8227e-07	2.8227e-07	1.49711e-06
GOTERM_BP_FAT	GO:0032268~regulation of cellular protein metabolic process	20	13.8889	4.19292e-07	SOCS3, MAGOH, CDC20, FEM1B, PRKCE, PIN1, EIF4A3, PRKAR2A, CCND1, EIF4EBP1, EIF3B, MAD2L1, RBM8A, PSMA3, PSMD2, DNMT1, PPP2R4, UBE2D1, BMP7, UBA52	141	474	13528	4.04824	0.00059438	0.00059438	0.000691929
GOTERM_CC_FAT	GO:0031981~nuclear lumen	34	23.6111	5.55e-07	MMS19, XRCC6, PRKDC, CHEK2, NFKB2, XRCC1, CDT1, FOS, SAP30, CIR1, RBM8A, PRPF8, UBE2D1, MYB, FGF1, MYC, CCNA2, APEX1, GEMIN4, PITX2, BGLAP, MAGOH, CCNL1, CDC20, MCM2, RPS6, USF1, HNRNPA1, ARHGEF11, EIF4A3, CCND1, PCNA, NCOR1, UBA52	119	1450	12782	2.51862	0.000135411	6.77077e-05	0.00071824
GOTERM_BP_FAT	GO:0009725~response to hormone stimulus	17	11.8056	1.24364e-06	MMS19, STS, SOCS3, STAT5A, ESR1, PRKDC, AURKA, USF1, SRC, FOS, PRKAR2A, CCND1, GRB10, EIF4EBP1, GNAS, BMP7, CCNA2	141	367	13528	4.44424	0.00176194	0.000881356	0.00205229
GOTERM_BP_FAT	GO:0031399~regulation of protein modification process	15	10.4167	2.23975e-06	SOCS3, CDC20, FEM1B, PRKCE, PIN1, PRKAR2A, CCND1, MAD2L1, PSMA3, PSMD2, DNMT1, PPP2R4, UBE2D1, BMP7, UBA52	141	295	13528	4.87847	0.00317094	0.0010581	0.00369606
GOTERM_CC_FAT	GO:0043233~organelle lumen	37	25.6944	4.1795e-06	MMS19, XRCC6, PRKDC, CHEK2, NFKB2, XRCC1, CDT1, FOS, SAP30, CIR1, RBM8A, PRPF8, UBE2D1, MYB, FGF1, MYC, CCNA2, APEX1, GEMIN4, PITX2, BGLAP, SUCLG1, MAGOH, CCNL1, CDC20, MCM2, RPS6, USF1, HNRNPA1, ARHGEF11, EIF4A3, CCND1, F5, PCNA, NCOR1, PROS1, UBA52	119	1820	12782	2.18365	0.00101928	0.000339876	0.00540869
GOTERM_BP_FAT	GO:0009719~response to endogenous stimulus	17	11.8056	4.44731e-06	MMS19, STS, SOCS3, STAT5A, ESR1, PRKDC, AURKA, USF1, SRC, FOS, PRKAR2A, CCND1, GRB10, EIF4EBP1, GNAS, BMP7, CCNA2	141	405	13528	4.02725	0.00628646	0.00157533	0.00733886
GOTERM_CC_FAT	GO:0031974~membrane-enclosed lumen	37	25.6944	6.58046e-06	MMS19, XRCC6, PRKDC, CHEK2, NFKB2, XRCC1, CDT1, FOS, SAP30, CIR1, RBM8A, PRPF8, UBE2D1, MYB, FGF1, MYC, CCNA2, APEX1, GEMIN4, PITX2, BGLAP, SUCLG1, MAGOH, CCNL1, CDC20, MCM2, RPS6, USF1, HNRNPA1, ARHGEF11, EIF4A3, CCND1, F5, PCNA, NCOR1, PROS1, UBA52	119	1856	12782	2.14129	0.00160435	0.000401329	0.00851564
GOTERM_BP_FAT	GO:0010604~positive regulation of macromolecule metabolic process	25	17.3611	7.07444e-06	MMS19, STAT5A, XRCC6, PRKDC, CBFB, PIN1, FOS, PSMD2, RUNX1, UBE2D1, CCNA2, MYC, NTF3, ESR1, CDC20, USF1, ARHGEF11, CCND1, NEDD4, PSMA3, DNMT1, PPP2R4, BMP7, NFIC, UBA52	141	857	13528	2.79881	0.00998144	0.00200431	0.0116739
GOTERM_CC_FAT	GO:0005829~cytosol	30	20.8333	7.73343e-06	APLF, NFKB2, ITSN1, SRC, CDC37, ATF2, COPB2, EIF4EBP1, PRKAR2A, EIF3B, EIF3G, COPB1, EIF3F, PSMD2, UBE2D1, CCNA1, GEMIN4, PTPN7, HSP90AA1, AIMP2, EPRS, CDC20, RPS6, ARHGEF11, CCND1, MAD2L1, NEDD4, PSMA3, AKAP5, UBA52	119	1330	12782	2.42282	0.00188519	0.000377322	0.0100076
GOTERM_CC_FAT	GO:0044451~nucleoplasm part	18	12.5	1.28329e-05	MMS19, BGLAP, MAGOH, XRCC6, CCNL1, PRKDC, CHEK2, USF1, EIF4A3, SAP30, FOS, CIR1, RBM8A, PRPF8, NCOR1, MYC, GEMIN4, PITX2	119	555	12782	3.48362	0.00312636	0.00052174	0.0166062
GOTERM_BP_FAT	GO:0007049~cell cycle	23	15.9722	1.48629e-05	KHDRBS1, BGLAP, AURKA, CDC20, MCM2, AURKB, CHEK2, RACGAP1, MIS12, PIN1, CDT1, CCND1, KRT18, MAD2L1, PSMA3, PSMD2, UBE2D1, CCNA1, CCNA2, NCOR1, MYC, UBA52, TXNL4A	141	776	13528	2.84368	0.0208552	0.00350647	0.0245245
GOTERM_BP_FAT	GO:0051438~regulation of ubiquitin-protein ligase activity	8	5.55556	1.56625e-05	MAD2L1, PSMA3, PSMD2, CDC20, UBE2D1, FEM1B, UBA52, PIN1	141	78	13528	9.84033	0.0219648	0.00316778	0.0258438
GOTERM_BP_FAT	GO:0010033~response to organic substance	22	15.2778	1.59132e-05	MMS19, STS, HSP90AA1, SOCS3, STAT5A, DICER1, ESR1, PRKDC, AURKA, XRCC1, USF1, SRC, FOS, PRKAR2A, CCND1, GRB10, EIF4EBP1, GNAS, BMP7, CCNA2, MYC, LTA	141	721	13528	2.92753	0.0223123	0.00281665	0.0262572
GOTERM_CC_FAT	GO:0070013~intracellular organelle lumen	35	24.3056	1.81095e-05	MMS19, XRCC6, PRKDC, CHEK2, NFKB2, XRCC1, CDT1, FOS, SAP30, CIR1, RBM8A, PRPF8, UBE2D1, MYB, FGF1, MYC, CCNA2, APEX1, GEMIN4, PITX2, BGLAP, SUCLG1, MAGOH, CCNL1, CDC20, MCM2, RPS6, USF1, HNRNPA1, ARHGEF11, EIF4A3, CCND1, PCNA, NCOR1, UBA52	119	1779	12782	2.11322	0.004409	0.00063105	0.0234335
GOTERM_BP_FAT	GO:0051340~regulation of ligase activity	8	5.55556	2.009e-05	MAD2L1, PSMA3, PSMD2, CDC20, UBE2D1, FEM1B, UBA52, PIN1	141	81	13528	9.47588	0.028086	0.00316033	0.0331482
GOTERM_BP_FAT	GO:0000278~mitotic cell cycle	15	10.4167	2.94294e-05	KHDRBS1, BGLAP, AURKA, CDC20, AURKB, MIS12, CCND1, MAD2L1, PSMA3, PSMD2, UBE2D1, CCNA1, CCNA2, UBA52, TXNL4A	141	370	13528	3.88959	0.0408727	0.00416445	0.0485543
GOTERM_BP_FAT	GO:0022402~cell cycle process	18	12.5	7.40986e-05	KHDRBS1, BGLAP, AURKA, CDC20, AURKB, RACGAP1, MIS12, CCND1, MAD2L1, PSMA3, PSMD2, UBE2D1, CCNA1, NCOR1, MYC, CCNA2, UBA52, TXNL4A	141	565	13528	3.0566	0.0997436	0.00950686	0.12221
GOTERM_BP_FAT	GO:0007242~intracellular signaling cascade	29	20.1389	7.51756e-05	CXCL1, EFNA1, STAT5A, PTH1R, AURKA, CXCR2, CHEK2, ITSN1, SRC, BTK, RRAGC, PRKAR2A, KISS1R, FGF1, CCNA2, FEN1, LTA, CCM2, SOCS3, ESR1, RPS6, PRKCE, RACGAP1, ARHGEF11, CCND1, NEDD4, KRIT1, PCNA, GNAS	141	1256	13528	2.21525	0.101118	0.00884424	0.123985
GOTERM_BP_FAT	GO:0031396~regulation of protein ubiquitination	8	5.55556	7.85666e-05	MAD2L1, PSMA3, PSMD2, CDC20, UBE2D1, FEM1B, UBA52, PIN1	141	100	13528	7.67546	0.10543	0.00853352	0.129574
GOTERM_BP_FAT	GO:0032269~negative regulation of cellular protein metabolic process	10	6.94444	0.000105148	EIF4A3, EIF4EBP1, MAD2L1, PSMA3, PSMD2, DNMT1, PPP2R4, CDC20, UBE2D1, UBA52	141	180	13528	5.33018	0.138524	0.0105941	0.173378
GOTERM_BP_FAT	GO:0031401~positive regulation of protein modification process	10	6.94444	0.000140545	CCND1, PSMA3, PSMD2, DNMT1, PPP2R4, CDC20, UBE2D1, BMP7, UBA52, PIN1	141	187	13528	5.13066	0.180701	0.0131992	0.23168
GOTERM_BP_FAT	GO:0051248~negative regulation of protein metabolic process	10	6.94444	0.000140545	EIF4A3, EIF4EBP1, MAD2L1, PSMA3, PSMD2, DNMT1, PPP2R4, CDC20, UBE2D1, UBA52	141	187	13528	5.13066	0.180701	0.0131992	0.23168
GOTERM_CC_FAT	GO:0016604~nuclear body	9	6.25	0.000161773	EIF4A3, CIR1, RBM8A, PRPF8, MAGOH, CCNL1, CHEK2, MYC, GEMIN4	119	168	12782	5.7542	0.0387069	0.00492233	0.209154
GOTERM_BP_FAT	GO:0043434~response to peptide hormone stimulus	9	6.25	0.000197423	STS, EIF4EBP1, GRB10, SOCS3, STAT5A, PRKDC, BMP7, USF1, CCNA2	141	154	13528	5.60707	0.244196	0.0173462	0.325297
GOTERM_BP_FAT	GO:0010605~negative regulation of macromolecule metabolic process	20	13.8889	0.000198957	KHDRBS1, DICER1, CDC20, CDT1, EIF4A3, SAP30, EIF4EBP1, CIR1, MAD2L1, NEDD4, PSMA3, PSMD2, SFTPD, DNMT1, PPP2R4, UBE2D1, NFIC, NCOR1, MYC, UBA52	141	734	13528	2.61426	0.245838	0.01646	0.32782
GOTERM_BP_FAT	GO:0051247~positive regulation of protein metabolic process	11	7.63889	0.000216439	CCND1, NEDD4, PSMA3, PSMD2, DNMT1, PPP2R4, CDC20, UBE2D1, BMP7, UBA52, PIN1	141	243	13528	4.34311	0.264308	0.0169078	0.356577
GOTERM_CC_FAT	GO:0005681~spliceosome	8	5.55556	0.000217538	EIF4A3, RBM8A, U2AF2, PRPF8, MAGOH, HNRNPA1, GEMIN4, TXNL4A	119	132	12782	6.5098	0.0517006	0.00588098	0.281157
GOTERM_BP_FAT	GO:0042981~regulation of apoptosis	21	14.5833	0.000226311	NTF3, SOCS3, STAT5A, ESR1, PRKDC, CHEK2, ITSN1, RPS6, FEM1B, PRKCE, NLRP1, SRC, ARHGEF11, BTK, CASP5, KRT18, SEMA4D, BMP7, MYC, UBA52, LTA	141	804	13528	2.50598	0.274537	0.01675	0.372813
GOTERM_BP_FAT	GO:0031400~negative regulation of protein modification process	8	5.55556	0.000233631	MAD2L1, PSMA3, PSMD2, DNMT1, PPP2R4, CDC20, UBE2D1, UBA52	141	119	13528	6.44997	0.28203	0.0164299	0.38485
GOTERM_BP_FAT	GO:0043067~regulation of programmed cell death	21	14.5833	0.000257755	NTF3, SOCS3, STAT5A, ESR1, PRKDC, CHEK2, ITSN1, RPS6, FEM1B, PRKCE, NLRP1, SRC, ARHGEF11, BTK, CASP5, KRT18, SEMA4D, BMP7, MYC, UBA52, LTA	141	812	13528	2.48129	0.30618	0.0172562	0.424507
GOTERM_BP_FAT	GO:0010941~regulation of cell death	21	14.5833	0.000270501	NTF3, SOCS3, STAT5A, ESR1, PRKDC, CHEK2, ITSN1, RPS6, FEM1B, PRKCE, NLRP1, SRC, ARHGEF11, BTK, CASP5, KRT18, SEMA4D, BMP7, MYC, UBA52, LTA	141	815	13528	2.47216	0.318611	0.0172862	0.445456
GOTERM_BP_FAT	GO:0043085~positive regulation of catalytic activity	16	11.1111	0.000316592	EFNA1, PTH1R, CXCR2, CDC20, NLRP1, PIN1, PRKAR2A, CCND1, KISS1R, PSMA3, PSMD2, GNAS, PPP2R4, UBE2D1, MYC, UBA52	141	520	13528	2.9521	0.361733	0.0193323	0.521171
GOTERM_BP_FAT	GO:0010628~positive regulation of gene expression	17	11.8056	0.000333278	MMS19, NTF3, STAT5A, XRCC6, ESR1, PRKDC, USF1, CBFB, ARHGEF11, FOS, DNMT1, RUNX1, NFIC, BMP7, MYC, CCNA2, UBA52	141	581	13528	2.80729	0.376662	0.0195018	0.548569
GOTERM_BP_FAT	GO:0032870~cellular response to hormone stimulus	8	5.55556	0.000460269	FOS, PRKAR2A, EIF4EBP1, GRB10, STAT5A, PRKDC, GNAS, USF1	141	133	13528	5.77102	0.47942	0.0257745	0.756848
GOTERM_BP_FAT	GO:0043065~positive regulation of apoptosis	14	9.72222	0.000519759	PRKDC, CHEK2, ITSN1, FEM1B, PRKCE, RPS6, SRC, NLRP1, ARHGEF11, BTK, BMP7, MYC, LTA, UBA52	141	430	13528	3.12373	0.521553	0.027956	0.854279
GOTERM_BP_FAT	GO:0051436~negative regulation of ubiquitin-protein ligase activity during mitotic cell cycle	6	4.16667	0.000554526	MAD2L1, PSMA3, PSMD2, CDC20, UBE2D1, UBA52	141	65	13528	8.8563	0.54458	0.0287107	0.911177
GOTERM_BP_FAT	GO:0031145~anaphase-promoting complex-dependent proteasomal ubiquitin-dependent protein catabolic process	6	4.16667	0.000554526	MAD2L1, PSMA3, PSMD2, CDC20, UBE2D1, UBA52	141	65	13528	8.8563	0.54458	0.0287107	0.911177
GOTERM_BP_FAT	GO:0043068~positive regulation of programmed cell death	14	9.72222	0.000554816	PRKDC, CHEK2, ITSN1, FEM1B, PRKCE, RPS6, SRC, NLRP1, ARHGEF11, BTK, BMP7, MYC, LTA, UBA52	141	433	13528	3.10209	0.544768	0.027714	0.911651
GOTERM_BP_FAT	GO:0010942~positive regulation of cell death	14	9.72222	0.000579284	PRKDC, CHEK2, ITSN1, FEM1B, PRKCE, RPS6, SRC, NLRP1, ARHGEF11, BTK, BMP7, MYC, LTA, UBA52	141	435	13528	3.08783	0.5603	0.0279356	0.951676
GOTERM_BP_FAT	GO:0051352~negative regulation of ligase activity	6	4.16667	0.000637745	MAD2L1, PSMA3, PSMD2, CDC20, UBE2D1, UBA52	141	67	13528	8.59193	0.595301	0.0297036	1.04724
GOTERM_BP_FAT	GO:0051444~negative regulation of ubiquitin-protein ligase activity	6	4.16667	0.000637745	MAD2L1, PSMA3, PSMD2, CDC20, UBE2D1, UBA52	141	67	13528	8.59193	0.595301	0.0297036	1.04724
GOTERM_BP_FAT	GO:0032270~positive regulation of cellular protein metabolic process	10	6.94444	0.000709171	CCND1, PSMA3, PSMD2, DNMT1, PPP2R4, CDC20, UBE2D1, BMP7, UBA52, PIN1	141	233	13528	4.11774	0.634307	0.0319295	1.16389
GOTERM_BP_FAT	GO:0043627~response to estrogen stimulus	7	4.86111	0.000767078	CCND1, STS, SOCS3, ESR1, AURKA, BMP7, CCNA2	141	105	13528	6.39622	0.663155	0.0334325	1.25836
GOTERM_BP_FAT	GO:0051443~positive regulation of ubiquitin-protein ligase activity	6	4.16667	0.000779681	PSMA3, PSMD2, CDC20, UBE2D1, UBA52, PIN1	141	70	13528	8.22371	0.669126	0.0329603	1.27891
GOTERM_BP_FAT	GO:0051439~regulation of ubiquitin-protein ligase activity during mitotic cell cycle	6	4.16667	0.000831857	MAD2L1, PSMA3, PSMD2, CDC20, UBE2D1, UBA52	141	71	13528	8.10788	0.692741	0.0341124	1.36395
GOTERM_BP_FAT	GO:0048545~response to steroid hormone stimulus	9	6.25	0.000861614	FOS, CCND1, STS, SOCS3, ESR1, AURKA, BMP7, CCNA2, SRC	141	192	13528	4.49734	0.705447	0.03432	1.41241
GOTERM_BP_FAT	GO:0051351~positive regulation of ligase activity	6	4.16667	0.000943969	PSMA3, PSMD2, CDC20, UBE2D1, UBA52, PIN1	141	73	13528	7.88575	0.737939	0.036516	1.54643
GOTERM_BP_FAT	GO:0051301~cell division	11	7.63889	0.000988227	BGLAP, CCND1, MAD2L1, CDC20, AURKB, CCNA1, RACGAP1, CCNA2, MIS12, ARHGEF11, TXNL4A	141	295	13528	3.57755	0.753896	0.037183	1.61838
GOTERM_BP_FAT	GO:0031397~negative regulation of protein ubiquitination	6	4.16667	0.00100406	MAD2L1, PSMA3, PSMD2, CDC20, UBE2D1, UBA52	141	74	13528	7.77918	0.759365	0.0367922	1.6441
GOTERM_BP_FAT	GO:0051173~positive regulation of nitrogen compound metabolic process	17	11.8056	0.00101363	MMS19, HSP90AA1, NTF3, STAT5A, XRCC6, KLRK1, PRKDC, USF1, CBFB, ARHGEF11, FOS, RUNX1, NFIC, BMP7, MYC, CCNA2, UBA52	141	644	13528	2.53266	0.762613	0.0362019	1.65966
GOTERM_BP_FAT	GO:0007346~regulation of mitotic cell cycle	8	5.55556	0.00101703	CCND1, MAD2L1, STAT5A, CCNA2, MYC, LTA, CDT1, PIN1	141	152	13528	5.04965	0.763755	0.0354293	1.66518
GOTERM_BP_FAT	GO:0044093~positive regulation of molecular function	16	11.1111	0.00108728	EFNA1, PTH1R, CXCR2, CDC20, NLRP1, PIN1, PRKAR2A, CCND1, KISS1R, PSMA3, PSMD2, GNAS, PPP2R4, UBE2D1, MYC, UBA52	141	586	13528	2.61961	0.786175	0.0369254	1.77922
GOTERM_BP_FAT	GO:0009314~response to radiation	9	6.25	0.00112154	FOS, CCND1, NEDD4, SOCS3, XRCC6, PRKDC, USF1, MYC, FEN1	141	200	13528	4.31745	0.796326	0.0371778	1.8348
GOTERM_BP_FAT	GO:0044265~cellular macromolecule catabolic process	18	12.5	0.00132427	SOCS3, USP5, MAGOH, SMG7, UBE2L6, CDC20, FEM1B, EIF4A3, MAD2L1, RBM8A, NEDD4, PSMA3, PSMD2, NEDD4L, UBE2D1, MYC, UBA52, FEN1	141	725	13528	2.38204	0.847265	0.0427579	2.16306
GOTERM_BP_FAT	GO:0009628~response to abiotic stimulus	12	8.33333	0.00153881	FOS, CCND1, STS, TCAP, NEDD4, SOCS3, XRCC6, PRKDC, USF1, MYC, FEN1, LTA	141	368	13528	3.12858	0.887377	0.0484183	2.50933
GOTERM_MF_FAT	GO:0008134~transcription factor binding	14	9.72222	0.00164247	MMS19, BGLAP, PRKDC, NFKB2, USF1, CBFB, ATF2, SAP30, CIR1, DNMT1, RUNX1, APEX1, NCOR1, PITX2	129	513	12983	2.7466	0.452986	0.452986	2.23862
GOTERM_BP_FAT	GO:0031398~positive regulation of protein ubiquitination	6	4.16667	0.00177216	PSMA3, PSMD2, CDC20, UBE2D1, UBA52, PIN1	141	84	13528	6.85309	0.919149	0.0543589	2.88465
GOTERM_BP_FAT	GO:0031328~positive regulation of cellular biosynthetic process	17	11.8056	0.00191708	MMS19, HSP90AA1, NTF3, STAT5A, XRCC6, KLRK1, PRKDC, USF1, CBFB, ARHGEF11, FOS, RUNX1, NFIC, BMP7, MYC, CCNA2, UBA52	141	685	13528	2.38107	0.934193	0.0574372	3.11706
GOTERM_BP_FAT	GO:0000280~nuclear division	9	6.25	0.00205063	BGLAP, MAD2L1, CDC20, AURKA, AURKB, CCNA1, CCNA2, MIS12, TXNL4A	141	220	13528	3.92495	0.945567	0.0600527	3.33077
GOTERM_BP_FAT	GO:0007067~mitosis	9	6.25	0.00205063	BGLAP, MAD2L1, CDC20, AURKA, AURKB, CCNA1, CCNA2, MIS12, TXNL4A	141	220	13528	3.92495	0.945567	0.0600527	3.33077
GOTERM_BP_FAT	GO:0009991~response to extracellular stimulus	9	6.25	0.00205063	MUC1, FOS, BGLAP, CCND1, SOCS3, BMP7, USF1, LTA, MEST	141	220	13528	3.92495	0.945567	0.0600527	3.33077
GOTERM_BP_FAT	GO:0045941~positive regulation of transcription	15	10.4167	0.00212503	MMS19, NTF3, STAT5A, XRCC6, PRKDC, USF1, CBFB, ARHGEF11, FOS, RUNX1, NFIC, BMP7, MYC, CCNA2, UBA52	141	564	13528	2.55168	0.951028	0.0609098	3.44963
GOTERM_BP_FAT	GO:0009891~positive regulation of biosynthetic process	17	11.8056	0.00221898	MMS19, HSP90AA1, NTF3, STAT5A, XRCC6, KLRK1, PRKDC, USF1, CBFB, ARHGEF11, FOS, RUNX1, NFIC, BMP7, MYC, CCNA2, UBA52	141	695	13528	2.34681	0.957148	0.0622631	3.59953
GOTERM_BP_FAT	GO:0006259~DNA metabolic process	14	9.72222	0.00227227	MMS19, APLF, XRCC6, PRKDC, MCM2, XRCC1, CDT1, FOS, PCNA, DNMT1, NFIC, APEX1, MYC, FEN1	141	506	13528	2.65456	0.960274	0.062478	3.68447
GOTERM_BP_FAT	GO:0000087~M phase of mitotic cell cycle	9	6.25	0.00229387	BGLAP, MAD2L1, CDC20, AURKA, AURKB, CCNA1, CCNA2, MIS12, TXNL4A	141	224	13528	3.85486	0.961475	0.0618561	3.71887
GOTERM_BP_FAT	GO:0051726~regulation of cell cycle	11	7.63889	0.00232301	CCND1, MAD2L1, STAT5A, CHEK2, BMP7, CCNA2, MYC, CDC37, LTA, CDT1, PIN1	141	331	13528	3.18845	0.963038	0.0614512	3.76526
GOTERM_CC_FAT	GO:0005819~spindle	7	4.86111	0.00239485	MAD2L1, CDC20, AURKA, AURKB, RACGAP1, MYC, NCOR1	119	147	12782	5.11485	0.442918	0.0568259	3.05531
GOTERM_CC_FAT	GO:0016607~nuclear speck	6	4.16667	0.00262585	EIF4A3, CIR1, RBM8A, PRPF8, MAGOH, CCNL1	119	103	12782	6.257	0.473524	0.0566545	3.34542
GOTERM_BP_FAT	GO:0048285~organelle fission	9	6.25	0.00262922	BGLAP, MAD2L1, CDC20, AURKA, AURKB, CCNA1, CCNA2, MIS12, TXNL4A	141	229	13528	3.7707	0.976082	0.0680132	4.25152
GOTERM_MF_FAT	GO:0003690~double-stranded DNA binding	6	4.16667	0.00269207	FOS, XRCC6, PCNA, USF1, MYC, FEN1	129	97	12983	6.22537	0.628171	0.390222	3.64475
GOTERM_BP_FAT	GO:0008380~RNA splicing	10	6.94444	0.00278464	EIF4A3, CIR1, RBM8A, U2AF2, PRPF8, MAGOH, HNRNPA1, GEMIN4, RRAGC, TXNL4A	141	284	13528	3.37828	0.980825	0.0706078	4.49745
GOTERM_CC_FAT	GO:0030529~ribonucleoprotein complex	13	9.02778	0.00283615	ABCF1, U2AF2, MAGOH, DICER1, RPS6, HNRNPA1, EIF4A3, RBM8A, PRPF8, APEX1, GEMIN4, UBA52, TXNL4A	119	515	12782	2.71136	0.499928	0.0561143	3.60883
GOTERM_BP_FAT	GO:0009057~macromolecule catabolic process	18	12.5	0.00290161	SOCS3, USP5, MAGOH, SMG7, UBE2L6, CDC20, FEM1B, EIF4A3, MAD2L1, RBM8A, NEDD4, PSMA3, PSMD2, NEDD4L, UBE2D1, MYC, UBA52, FEN1	141	781	13528	2.21124	0.983763	0.07218	4.68215
GOTERM_BP_FAT	GO:0007167~enzyme linked receptor protein signaling pathway	11	7.63889	0.00294033	EPHA4, FOS, EIF4EBP1, GRB10, EFNA1, STAT5A, UBE2D1, BMP7, FGF1, AKAP3, SRC	141	342	13528	3.08589	0.984633	0.071851	4.74321
GOTERM_BP_FAT	GO:0006366~transcription from RNA polymerase II promoter	9	6.25	0.00300181	BGLAP, CEBPD, GTF2I, NFIC, USF1, APEX1, MYC, NCOR1, CBFB	141	234	13528	3.69013	0.98592	0.0720607	4.8401
GOTERM_BP_FAT	GO:0019932~second-messenger-mediated signaling	9	6.25	0.00308104	KISS1R, PTH1R, PCNA, GNAS, CXCR2, AURKA, FEN1, LTA, BTK	141	235	13528	3.67442	0.98742	0.0726669	4.96481
GOTERM_MF_FAT	GO:0043566~structure-specific DNA binding	7	4.86111	0.00311009	FOS, XRCC6, PCNA, USF1, HNRNPA1, MYC, FEN1	129	145	12983	4.85865	0.681197	0.316863	4.19953
GOTERM_CC_FAT	GO:0000779~condensed chromosome, centromeric region	5	3.47222	0.0032017	BGLAP, MAD2L1, CENPT, AURKB, MIS12	119	66	12782	8.13725	0.542724	0.0584142	4.06512
GOTERM_BP_FAT	GO:0007584~response to nutrient	7	4.86111	0.0033361	MUC1, BGLAP, CCND1, BMP7, USF1, LTA, MEST	141	140	13528	4.79716	0.991248	0.0771731	5.36527
GOTERM_BP_FAT	GO:0006351~transcription, DNA-dependent	10	6.94444	0.0033484	BGLAP, CEBPD, GTF2I, ESR1, NFIC, USF1, APEX1, MYC, NCOR1, CBFB	141	292	13528	3.28573	0.9914	0.0762063	5.38453
GOTERM_CC_FAT	GO:0031982~vesicle	15	10.4167	0.00345507	BGLAP, HSP90AA1, NTF3, ITSN1, RACGAP1, BTK, COPB2, BGN, F5, COPB1, SFTPD, GNAS, BMP7, PROS1, AKAP3	119	670	12782	2.40474	0.570227	0.058538	4.38023
GOTERM_BP_FAT	GO:0000184~nuclear-transcribed mRNA catabolic process, nonsense-mediated decay	4	2.77778	0.00358969	EIF4A3, RBM8A, MAGOH, SMG7	141	30	13528	12.7924	0.993899	0.080197	5.76184
GOTERM_BP_FAT	GO:0032774~RNA biosynthetic process	10	6.94444	0.00366215	BGLAP, CEBPD, GTF2I, ESR1, NFIC, USF1, APEX1, MYC, NCOR1, CBFB	141	296	13528	3.24133	0.994497	0.0804865	5.87486
GOTERM_BP_FAT	GO:0006928~cell motion	13	9.02778	0.00382456	NTF3, PRKDC, CXCR2, SRC, ARHGEF11, EPHA4, TNS1, PRSS3, LRP6, SFTPD, BMP7, UBA52, AKAP3	141	475	13528	2.62582	0.995633	0.0826332	6.12774
GOTERM_BP_FAT	GO:0022403~cell cycle phase	12	8.33333	0.00382479	KHDRBS1, BGLAP, CCND1, MAD2L1, CDC20, AURKA, AURKB, CCNA1, CCNA2, NCOR1, MIS12, TXNL4A	141	414	13528	2.78096	0.995634	0.0814008	6.12809
GOTERM_BP_FAT	GO:0045893~positive regulation of transcription, DNA-dependent	13	9.02778	0.00395482	MMS19, NTF3, STAT5A, XRCC6, PRKDC, USF1, CBFB, ARHGEF11, FOS, RUNX1, NFIC, BMP7, MYC	141	477	13528	2.61481	0.996372	0.0828157	6.33009
GOTERM_BP_FAT	GO:0043161~proteasomal ubiquitin-dependent protein catabolic process	6	4.16667	0.00412448	MAD2L1, PSMA3, PSMD2, CDC20, UBE2D1, UBA52	141	102	13528	5.64372	0.99715	0.0849688	6.59305
GOTERM_BP_FAT	GO:0010498~proteasomal protein catabolic process	6	4.16667	0.00412448	MAD2L1, PSMA3, PSMD2, CDC20, UBE2D1, UBA52	141	102	13528	5.64372	0.99715	0.0849688	6.59305
GOTERM_BP_FAT	GO:0051254~positive regulation of RNA metabolic process	13	9.02778	0.00422608	MMS19, NTF3, STAT5A, XRCC6, PRKDC, USF1, CBFB, ARHGEF11, FOS, RUNX1, NFIC, BMP7, MYC	141	481	13528	2.59306	0.997534	0.0857315	6.75018
GOTERM_BP_FAT	GO:0031667~response to nutrient levels	8	5.55556	0.00440062	MUC1, BGLAP, CCND1, SOCS3, BMP7, USF1, LTA, MEST	141	197	13528	3.89617	0.998077	0.0878659	7.01954
GOTERM_BP_FAT	GO:0006401~RNA catabolic process	5	3.47222	0.00456559	EIF4A3, RBM8A, MAGOH, SMG7, FEN1	141	65	13528	7.38025	0.99848	0.0897545	7.27347
GOTERM_BP_FAT	GO:0033273~response to vitamin	5	3.47222	0.00482175	MUC1, BGLAP, CCND1, BMP7, MEST	141	66	13528	7.26843	0.998945	0.0932705	7.66646
GOTERM_BP_FAT	GO:0016071~mRNA metabolic process	11	7.63889	0.00511508	KHDRBS1, EIF4A3, CIR1, RBM8A, U2AF2, PRPF8, MAGOH, SMG7, HNRNPA1, GEMIN4, TXNL4A	141	370	13528	2.85237	0.999305	0.0973493	8.11455
GOTERM_BP_FAT	GO:0000377~RNA splicing, via transesterification reactions with bulged adenosine as nucleophile	7	4.86111	0.00514118	RBM8A, U2AF2, PRPF8, MAGOH, HNRNPA1, GEMIN4, TXNL4A	141	153	13528	4.38956	0.999331	0.0965313	8.15432
GOTERM_BP_FAT	GO:0000398~nuclear mRNA splicing, via spliceosome	7	4.86111	0.00514118	RBM8A, U2AF2, PRPF8, MAGOH, HNRNPA1, GEMIN4, TXNL4A	141	153	13528	4.38956	0.999331	0.0965313	8.15432
GOTERM_BP_FAT	GO:0000375~RNA splicing, via transesterification reactions	7	4.86111	0.00514118	RBM8A, U2AF2, PRPF8, MAGOH, HNRNPA1, GEMIN4, TXNL4A	141	153	13528	4.38956	0.999331	0.0965313	8.15432
GOTERM_BP_FAT	GO:0045944~positive regulation of transcription from RNA polymerase II promoter	11	7.63889	0.00521131	FOS, NTF3, STAT5A, XRCC6, PRKDC, NFIC, BMP7, RUNX1, USF1, MYC, CBFB	141	371	13528	2.84468	0.999394	0.0965122	8.26112
GOTERM_BP_FAT	GO:0045935~positive regulation of nucleobase, nucleoside, nucleotide and nucleic acid metabolic process	15	10.4167	0.00524277	MMS19, NTF3, STAT5A, XRCC6, PRKDC, USF1, CBFB, ARHGEF11, FOS, RUNX1, NFIC, BMP7, MYC, CCNA2, UBA52	141	624	13528	2.30633	0.999421	0.0958202	8.30897
GOTERM_BP_FAT	GO:0051437~positive regulation of ubiquitin-protein ligase activity during mitotic cell cycle	5	3.47222	0.0053627	PSMA3, PSMD2, CDC20, UBE2D1, UBA52	141	68	13528	7.05465	0.999512	0.0966666	8.49123
GOTERM_BP_FAT	GO:0006974~response to DNA damage stimulus	11	7.63889	0.00540805	MMS19, CCND1, APLF, XRCC6, PCNA, PRKDC, CHEK2, XRCC1, CCNA2, APEX1, FEN1	141	373	13528	2.82943	0.999542	0.0962267	8.56006
GOTERM_BP_FAT	GO:0000956~nuclear-transcribed mRNA catabolic process	4	2.77778	0.00557321	EIF4A3, RBM8A, MAGOH, SMG7	141	35	13528	10.9649	0.999638	0.0978018	8.81032
GOTERM_BP_FAT	GO:0033554~cellular response to stress	14	9.72222	0.00585406	MMS19, CCM2, APLF, XRCC6, PRKDC, CHEK2, XRCC1, FOS, CCND1, NEDD4, PCNA, APEX1, CCNA2, FEN1	141	566	13528	2.37315	0.999758	0.101238	9.23439
GOTERM_BP_FAT	GO:0006917~induction of apoptosis	10	6.94444	0.00606011	CHEK2, ITSN1, FEM1B, PRKCE, MYC, NLRP1, UBA52, LTA, ARHGEF11, BTK	141	320	13528	2.99823	0.999819	0.103365	9.54434
GOTERM_CC_FAT	GO:0031988~membrane-bounded vesicle	13	9.02778	0.00617598	BGLAP, HSP90AA1, NTF3, RACGAP1, ITSN1, COPB2, BGN, F5, COPB1, SFTPD, BMP7, PROS1, AKAP3	119	568	12782	2.45837	0.779446	0.0958627	7.70434
GOTERM_BP_FAT	GO:0012502~induction of programmed cell death	10	6.94444	0.00618136	CHEK2, ITSN1, FEM1B, PRKCE, MYC, NLRP1, UBA52, LTA, ARHGEF11, BTK	141	321	13528	2.98889	0.999848	0.10408	9.72627
GOTERM_BP_FAT	GO:0006397~mRNA processing	10	6.94444	0.00618136	KHDRBS1, EIF4A3, CIR1, RBM8A, U2AF2, PRPF8, MAGOH, HNRNPA1, GEMIN4, TXNL4A	141	321	13528	2.98889	0.999848	0.10408	9.72627
GOTERM_MF_FAT	GO:0030528~transcription regulator activity	26	18.0556	0.0063167	MMS19, LMO1, STAT5A, XRCC6, NFKB2, CBFB, ATF2, FOS, SAP30, CIR1, PHTF1, RUNX1, MYB, MYC, APEX1, PITX2, KHDRBS1, BGLAP, CEBPD, RUNX1T1, ESR1, USF1, GTF2I, NFIC, NCOR1, UBA52	129	1512	12983	1.73064	0.902273	0.440882	8.35769
GOTERM_BP_FAT	GO:0010608~posttranscriptional regulation of gene expression	8	5.55556	0.00636557	EIF4A3, EIF4EBP1, EIF3B, RBM8A, MAGOH, DICER1, PRKDC, AURKA	141	211	13528	3.63766	0.999883	0.105771	10.002
GOTERM_BP_FAT	GO:0000279~M phase	10	6.94444	0.0072201	BGLAP, MAD2L1, CDC20, AURKA, AURKB, CCNA1, CCNA2, NCOR1, MIS12, TXNL4A	141	329	13528	2.91621	0.999966	0.117775	11.2708
GOTERM_BP_FAT	GO:0010557~positive regulation of macromolecule biosynthetic process	15	10.4167	0.00782407	MMS19, NTF3, STAT5A, XRCC6, PRKDC, USF1, CBFB, ARHGEF11, FOS, RUNX1, NFIC, BMP7, MYC, CCNA2, UBA52	141	654	13528	2.20053	0.999985	0.12558	12.1574
GOTERM_CC_FAT	GO:0005852~eukaryotic translation initiation factor 3 complex	3	2.08333	0.00820298	EIF3B, EIF3G, EIF3F	119	15	12782	21.4824	0.865982	0.118042	10.111
GOTERM_BP_FAT	GO:0002761~regulation of myeloid leukocyte differentiation	4	2.77778	0.00867768	BGLAP, STAT5A, GNAS, RUNX1	141	41	13528	9.36032	0.999996	0.136816	13.3963
GOTERM_BP_FAT	GO:0045597~positive regulation of cell differentiation	8	5.55556	0.00977392	NTF3, SOCS3, STAT5A, XRCC6, GNAS, SEMA4D, BMP7, RUNX1	141	229	13528	3.35173	0.999999	0.151134	14.9632
GOTERM_BP_FAT	GO:0006402~mRNA catabolic process	4	2.77778	0.00989677	EIF4A3, RBM8A, MAGOH, SMG7	141	43	13528	8.92495	0.999999	0.151253	15.1371
GOTERM_BP_FAT	GO:0012501~programmed cell death	14	9.72222	0.0107754	AIMP2, PRKDC, CXCR2, ITSN1, FEM1B, NLRP1, ARHGEF11, RRAGC, CASP5, KRT18, KRT8, MYC, LTA, UBA52	141	611	13528	2.19837	1	0.161868	16.3714
GOTERM_BP_FAT	GO:0006396~RNA processing	13	9.02778	0.0112872	KHDRBS1, U2AF2, MAGOH, DICER1, RPS6, HNRNPA1, RRAGC, EIF4A3, CIR1, RBM8A, PRPF8, GEMIN4, TXNL4A	141	547	13528	2.28019	1	0.167159	17.0826
GOTERM_BP_FAT	GO:0051028~mRNA transport	5	3.47222	0.0126148	EIF4A3, RBM8A, MAGOH, SMG7, HNRNPA1	141	87	13528	5.51398	1	0.183122	18.9009
GOTERM_BP_FAT	GO:0006511~ubiquitin-dependent protein catabolic process	8	5.55556	0.0129559	MAD2L1, NEDD4, USP5, PSMA3, PSMD2, CDC20, UBE2D1, UBA52	141	242	13528	3.17168	1	0.185729	19.3621
GOTERM_BP_FAT	GO:0048015~phosphoinositide-mediated signaling	5	3.47222	0.0131119	PTH1R, PCNA, CXCR2, AURKA, FEN1	141	88	13528	5.45132	1	0.185896	19.5721
GOTERM_CC_FAT	GO:0005667~transcription factor complex	7	4.86111	0.0131827	MMS19, FOS, BGLAP, XRCC6, PRKDC, USF1, PITX2	119	210	12782	3.58039	0.960756	0.173428	15.7798
GOTERM_MF_FAT	GO:0019207~kinase regulator activity	5	3.47222	0.0134088	CCND1, PRKAR2A, SOCS3, ITSN1, SPA17	129	93	12983	5.41094	0.992947	0.628743	16.9669
GOTERM_BP_FAT	GO:0002763~positive regulation of myeloid leukocyte differentiation	3	2.08333	0.014597	STAT5A, GNAS, RUNX1	141	18	13528	15.9905	1	0.202794	21.5462
GOTERM_BP_FAT	GO:0035116~embryonic hindlimb morphogenesis	3	2.08333	0.014597	DICER1, LRP6, GNAS	141	18	13528	15.9905	1	0.202794	21.5462
GOTERM_BP_FAT	GO:0000075~cell cycle checkpoint	5	3.47222	0.0146776	CCND1, MAD2L1, CHEK2, CCNA2, CDT1	141	91	13528	5.27161	1	0.201845	21.652
GOTERM_MF_FAT	GO:0003700~transcription factor activity	18	12.5	0.0151153	LMO1, CEBPD, STAT5A, ESR1, RUNX1T1, NFKB2, USF1, CBFB, ATF2, FOS, CIR1, GTF2I, PHTF1, RUNX1, NFIC, NCOR1, MYC, PITX2	129	975	12983	1.85803	0.996264	0.606082	18.9234
GOTERM_BP_FAT	GO:0046626~regulation of insulin receptor signaling pathway	3	2.08333	0.0162047	GRB10, SOCS3, SRC	141	19	13528	15.1489	1	0.218431	23.632
GOTERM_CC_FAT	GO:0000777~condensed chromosome kinetochore	4	2.77778	0.0163751	BGLAP, MAD2L1, CENPT, MIS12	119	58	12782	7.40771	0.982201	0.200533	19.2384
GOTERM_BP_FAT	GO:0031570~DNA integrity checkpoint	4	2.77778	0.0165711	CCND1, CHEK2, CCNA2, CDT1	141	52	13528	7.38025	1	0.220745	24.1
GOTERM_BP_FAT	GO:0051385~response to mineralocorticoid stimulus	3	2.08333	0.0178845	FOS, CCND1, SRC	141	20	13528	14.3915	1	0.23399	25.7556
GOTERM_BP_FAT	GO:0051236~establishment of RNA localization	5	3.47222	0.0181521	EIF4A3, RBM8A, MAGOH, SMG7, HNRNPA1	141	97	13528	4.94553	1	0.234936	26.0887
GOTERM_BP_FAT	GO:0050657~nucleic acid transport	5	3.47222	0.0181521	EIF4A3, RBM8A, MAGOH, SMG7, HNRNPA1	141	97	13528	4.94553	1	0.234936	26.0887
GOTERM_BP_FAT	GO:0050658~RNA transport	5	3.47222	0.0181521	EIF4A3, RBM8A, MAGOH, SMG7, HNRNPA1	141	97	13528	4.94553	1	0.234936	26.0887
GOTERM_BP_FAT	GO:0032355~response to estradiol stimulus	4	2.77778	0.0183237	SOCS3, AURKA, BMP7, CCNA2	141	54	13528	7.10691	1	0.23478	26.3016
GOTERM_BP_FAT	GO:0006357~regulation of transcription from RNA polymerase II promoter	15	10.4167	0.0183865	NTF3, STAT5A, XRCC6, PRKDC, USF1, CBFB, SAP30, FOS, NEDD4, DNMT1, RUNX1, NFIC, BMP7, NCOR1, MYC	141	727	13528	1.97957	1	0.233411	26.3794
GOTERM_MF_FAT	GO:0004520~endodeoxyribonuclease activity	3	2.08333	0.0195853	APLF, APEX1, FEN1	129	22	12983	13.7241	0.999296	0.64549	23.8473
GOTERM_MF_FAT	GO:0050816~phosphothreonine binding	2	1.38889	0.0196216	NEDD4, PIN1	129	2	12983	100.643	0.999306	0.59711	23.8861
GOTERM_MF_FAT	GO:0019871~sodium channel inhibitor activity	2	1.38889	0.0196216	NEDD4, NEDD4L	129	2	12983	100.643	0.999306	0.59711	23.8861
GOTERM_BP_FAT	GO:0045884~regulation of survival gene product expression	3	2.08333	0.0196346	STAT5A, ESR1, MYC	141	21	13528	13.7062	1	0.245114	27.9089
GOTERM_BP_FAT	GO:0006403~RNA localization	5	3.47222	0.0200654	EIF4A3, RBM8A, MAGOH, SMG7, HNRNPA1	141	100	13528	4.79716	1	0.247666	28.43
GOTERM_BP_FAT	GO:0032868~response to insulin stimulus	5	3.47222	0.0200654	EIF4EBP1, GRB10, SOCS3, PRKDC, USF1	141	100	13528	4.79716	1	0.247666	28.43
GOTERM_MF_FAT	GO:0016563~transcription activator activity	10	6.94444	0.0201394	MMS19, BGLAP, XRCC6, NFKB2, MYB, RUNX1, USF1, APEX1, CBFB, ATF2	129	410	12983	2.45472	0.999428	0.563786	24.4379
GOTERM_BP_FAT	GO:0009612~response to mechanical stimulus	4	2.77778	0.0201755	FOS, TCAP, MYC, LTA	141	56	13528	6.85309	1	0.246742	28.5625
GOTERM_BP_FAT	GO:0010766~negative regulation of sodium ion transport	2	1.38889	0.0205915	NEDD4, NEDD4L	141	2	13528	95.9433	1	0.249069	29.0614
GOTERM_BP_FAT	GO:0006468~protein amino acid phosphorylation	14	9.72222	0.0208592	EFNA1, STAT5A, PRKDC, AURKA, CHEK2, AURKB, PRKCE, SRC, BTK, TP53RK, EPHA4, CCND1, KISS1R, BMP7	141	667	13528	2.0138	1	0.2498	29.3807
GOTERM_BP_FAT	GO:0006915~apoptosis	13	9.02778	0.0223018	AIMP2, CXCR2, FEM1B, ITSN1, NLRP1, ARHGEF11, RRAGC, CASP5, KRT18, KRT8, MYC, LTA, UBA52	141	602	13528	2.07186	1	0.262574	31.0783
GOTERM_BP_FAT	GO:0009411~response to UV	4	2.77778	0.0231396	CCND1, NEDD4, USF1, FEN1	141	59	13528	6.50463	1	0.268885	32.0464
GOTERM_BP_FAT	GO:0043271~negative regulation of ion transport	3	2.08333	0.0233394	NEDD4, NEDD4L, LTA	141	23	13528	12.5143	1	0.268726	32.2754
GOTERM_CC_FAT	GO:0042383~sarcolemma	4	2.77778	0.0239554	BGN, KRT8, ESR1, GNAS	119	67	12782	6.41264	0.997305	0.267566	26.9326
GOTERM_BP_FAT	GO:0010212~response to ionizing radiation	4	2.77778	0.0241774	CCND1, SOCS3, XRCC6, PRKDC	141	60	13528	6.39622	1	0.274824	33.228
GOTERM_BP_FAT	GO:0033043~regulation of organelle organization	7	4.86111	0.0253315	KISS1R, MAD2L1, AKAP5, DNMT1, MYC, LTA, PIN1	141	217	13528	3.09494	1	0.283794	34.5194
GOTERM_BP_FAT	GO:0051094~positive regulation of developmental process	8	5.55556	0.0255625	NTF3, SOCS3, STAT5A, XRCC6, GNAS, SEMA4D, BMP7, RUNX1	141	278	13528	2.76096	1	0.28381	34.775
GOTERM_BP_FAT	GO:0006302~double-strand break repair	4	2.77778	0.0263276	APLF, XRCC6, PRKDC, FEN1	141	62	13528	6.18989	1	0.288824	35.615
GOTERM_CC_FAT	GO:0044427~chromosomal part	9	6.25	0.0265053	BGLAP, MAD2L1, NEDD4, XRCC6, PCNA, CENPT, MCM2, AURKB, MIS12	119	386	12782	2.50442	0.998576	0.27944	29.3647
GOTERM_MF_FAT	GO:0003712~transcription cofactor activity	9	6.25	0.0272266	MMS19, SAP30, BGLAP, CIR1, NFKB2, APEX1, NCOR1, CBFB, ATF2	129	363	12983	2.49529	0.99996	0.636897	31.6273
GOTERM_BP_FAT	GO:0007565~female pregnancy	5	3.47222	0.0273191	MUC1, FOS, STS, STAT5A, GNAS	141	110	13528	4.36106	1	0.295799	36.6885
GOTERM_BP_FAT	GO:0009968~negative regulation of signal transduction	7	4.86111	0.0273828	CCND1, GRB10, SOCS3, LRP6, ARAP3, NCOR1, PIN1	141	221	13528	3.03893	1	0.294191	36.7568
GOTERM_CC_FAT	GO:0035145~exon-exon junction complex	2	1.38889	0.0274424	RBM8A, MAGOH	119	3	12782	71.6078	0.998875	0.276252	30.2397
GOTERM_CC_FAT	GO:0000775~chromosome, centromeric region	5	3.47222	0.0277795	BGLAP, MAD2L1, CENPT, AURKB, MIS12	119	124	12782	4.33112	0.998966	0.268356	30.552
GOTERM_CC_FAT	GO:0016585~chromatin remodeling complex	4	2.77778	0.0278378	SAP30, CIR1, ESR1, NCOR1	119	71	12782	6.05137	0.998981	0.25882	30.6058
GOTERM_BP_FAT	GO:0006281~DNA repair	8	5.55556	0.0282742	MMS19, APLF, XRCC6, PCNA, PRKDC, XRCC1, APEX1, FEN1	141	284	13528	2.70263	1	0.300058	37.7065
GOTERM_MF_FAT	GO:0016891~endoribonuclease activity, producing 5'-phosphomonoesters	3	2.08333	0.0288249	DICER1, APEX1, FEN1	129	27	12983	11.1826	0.999978	0.623123	33.1585
GOTERM_BP_FAT	GO:0007169~transmembrane receptor protein tyrosine kinase signaling pathway	7	4.86111	0.0289917	EPHA4, EIF4EBP1, GRB10, EFNA1, STAT5A, FGF1, SRC	141	224	13528	2.99823	1	0.30425	38.4613
GOTERM_BP_FAT	GO:0019220~regulation of phosphate metabolic process	11	7.63889	0.0291703	KISS1R, CCND1, PRKAR2A, SOCS3, EFNA1, SMG7, PPP2R4, BMP7, PRKCE, CDC37, PIN1	141	485	13528	2.17603	1	0.303638	38.6478
GOTERM_BP_FAT	GO:0051174~regulation of phosphorus metabolic process	11	7.63889	0.0291703	KISS1R, CCND1, PRKAR2A, SOCS3, EFNA1, SMG7, PPP2R4, BMP7, PRKCE, CDC37, PIN1	141	485	13528	2.17603	1	0.303638	38.6478
GOTERM_BP_FAT	GO:0031100~organ regeneration	3	2.08333	0.0293846	CCND1, SOCS3, CCNA2	141	26	13528	11.0704	1	0.303347	38.8709
GOTERM_BP_FAT	GO:0035137~hindlimb morphogenesis	3	2.08333	0.0293846	DICER1, LRP6, GNAS	141	26	13528	11.0704	1	0.303347	38.8709
GOTERM_BP_FAT	GO:0015931~nucleobase, nucleoside, nucleotide and nucleic acid transport	5	3.47222	0.0297635	EIF4A3, RBM8A, MAGOH, SMG7, HNRNPA1	141	113	13528	4.24528	1	0.304481	39.2635
GOTERM_CC_FAT	GO:0016023~cytoplasmic membrane-bounded vesicle	11	7.63889	0.0307938	COPB2, BGN, HSP90AA1, F5, NTF3, COPB1, SFTPD, ITSN1, RACGAP1, PROS1, AKAP3	119	550	12782	2.14824	0.999515	0.272391	33.2874
GOTERM_BP_FAT	GO:0001503~ossification	5	3.47222	0.0314628	BGLAP, PTH1R, GNAS, BMP7, CBFB	141	115	13528	4.17145	1	0.316777	40.9954
GOTERM_CC_FAT	GO:0000793~condensed chromosome	5	3.47222	0.031491	BGLAP, MAD2L1, CENPT, AURKB, MIS12	119	129	12782	4.16325	0.999593	0.268235	33.9058
GOTERM_BP_FAT	GO:0032869~cellular response to insulin stimulus	4	2.77778	0.0333722	EIF4EBP1, GRB10, PRKDC, USF1	141	68	13528	5.64372	1	0.330403	42.886
GOTERM_BP_FAT	GO:0031032~actomyosin structure organization	3	2.08333	0.0337224	TCAP, MYOZ1, RACGAP1	141	28	13528	10.2796	1	0.331026	43.2265
GOTERM_BP_FAT	GO:0001932~regulation of protein amino acid phosphorylation	6	4.16667	0.0338915	CCND1, PRKAR2A, SOCS3, BMP7, PRKCE, PIN1	141	173	13528	3.32751	1	0.330182	43.3901
GOTERM_MF_FAT	GO:0019899~enzyme binding	11	7.63889	0.0339265	CCND1, NEDD4, U2AF2, SMG7, AKAP5, PPP2R4, AURKA, PRKCE, USF1, NCOR1, NLRP1	129	523	12983	2.11678	0.999997	0.652014	37.8355
GOTERM_CC_FAT	GO:0000776~kinetochore	4	2.77778	0.0342508	BGLAP, MAD2L1, CENPT, MIS12	119	77	12782	5.57983	0.999797	0.278963	36.3021
GOTERM_CC_FAT	GO:0031410~cytoplasmic vesicle	12	8.33333	0.0349164	COPB2, BGN, HSP90AA1, F5, NTF3, COPB1, SFTPD, ITSN1, RACGAP1, PROS1, AKAP3, BTK	119	642	12782	2.0077	0.999829	0.274708	36.8679
GOTERM_BP_FAT	GO:0008219~cell death	14	9.72222	0.035446	AIMP2, PRKDC, CXCR2, ITSN1, FEM1B, NLRP1, ARHGEF11, RRAGC, CASP5, KRT18, KRT8, MYC, LTA, UBA52	141	719	13528	1.86816	1	0.340357	44.8747
GOTERM_BP_FAT	GO:0045637~regulation of myeloid cell differentiation	4	2.77778	0.0359171	BGLAP, STAT5A, GNAS, RUNX1	141	70	13528	5.48247	1	0.341826	45.3173
GOTERM_BP_FAT	GO:0019941~modification-dependent protein catabolic process	12	8.33333	0.0359638	MAD2L1, NEDD4, SOCS3, USP5, PSMA3, PSMD2, UBE2L6, CDC20, NEDD4L, UBE2D1, FEM1B, UBA52	141	574	13528	2.00578	1	0.339984	45.3611
GOTERM_BP_FAT	GO:0043632~modification-dependent macromolecule catabolic process	12	8.33333	0.0359638	MAD2L1, NEDD4, SOCS3, USP5, PSMA3, PSMD2, UBE2L6, CDC20, NEDD4L, UBE2D1, FEM1B, UBA52	141	574	13528	2.00578	1	0.339984	45.3611
GOTERM_CC_FAT	GO:0000444~MIS12/MIND type complex	2	1.38889	0.0364229	BGLAP, MIS12	119	4	12782	53.7059	0.999883	0.276261	38.1315
GOTERM_BP_FAT	GO:0016265~death	14	9.72222	0.0371603	AIMP2, PRKDC, CXCR2, ITSN1, FEM1B, NLRP1, ARHGEF11, RRAGC, CASP5, KRT18, KRT8, MYC, LTA, UBA52	141	724	13528	1.85526	1	0.346994	46.4694
GOTERM_BP_FAT	GO:0060348~bone development	5	3.47222	0.038823	BGLAP, PTH1R, GNAS, BMP7, CBFB	141	123	13528	3.90013	1	0.357322	47.9747
GOTERM_MF_FAT	GO:0050815~phosphoserine binding	2	1.38889	0.0388612	NEDD4, PIN1	129	4	12983	50.3217	1	0.673383	42.0692
GOTERM_BP_FAT	GO:0051130~positive regulation of cellular component organization	6	4.16667	0.0399448	KISS1R, SFTPD, DNMT1, NEDD4L, SEMA4D, LTA	141	181	13528	3.18044	1	0.363387	48.9676
GOTERM_BP_FAT	GO:0051240~positive regulation of multicellular organismal process	7	4.86111	0.041316	KISS1R, STAT5A, KLRK1, BMP7, USF1, UBA52, LTA	141	244	13528	2.75247	1	0.371113	50.1572
GOTERM_MF_FAT	GO:0046983~protein dimerization activity	11	7.63889	0.0416443	FOS, MAD2L1, HSP90AA1, CEBPD, SUCLG1, RUNX1T1, PPP2R4, RUNX1, USF1, ATF2, RRAGC	129	542	12983	2.04258	1	0.672104	44.3374
GOTERM_MF_FAT	GO:0016893~endonuclease activity, active with either ribo- or deoxyribonucleic acids and producing 5'-phosphomonoesters	3	2.08333	0.0440673	DICER1, APEX1, FEN1	129	34	12983	8.8803	1	0.668013	46.2447
GOTERM_MF_FAT	GO:0004536~deoxyribonuclease activity	3	2.08333	0.0440673	APLF, APEX1, FEN1	129	34	12983	8.8803	1	0.668013	46.2447
GOTERM_BP_FAT	GO:0010648~negative regulation of cell communication	7	4.86111	0.0441243	CCND1, GRB10, SOCS3, LRP6, ARAP3, NCOR1, PIN1	141	248	13528	2.70808	1	0.388742	52.5128
GOTERM_BP_FAT	GO:0006508~proteolysis	18	12.5	0.0446442	CPA4, OSGEP, C4A, SOCS3, USP5, UBE2L6, C4BPB, CDC20, FEM1B, CASP5, MAD2L1, NEDD4, PSMA3, PRSS3, PSMD2, NEDD4L, UBE2D1, UBA52	141	1054	13528	1.6385	1	0.390043	52.9372
GOTERM_CC_FAT	GO:0043232~intracellular non-membrane-bounded organelle	33	22.9167	0.0451008	ABCF1, XRCC6, AURKA, AURKB, FOS, CIR1, KRT8, FGF1, CCNA1, MYC, SCNN1A, APEX1, GEMIN4, BGLAP, MYOZ1, CDC20, MCM2, RPS6, RACGAP1, HNRNPA1, MIS12, ARHGEF11, MAD2L1, TNS1, KRT18, NEDD4, KRIT1, PSMA3, PCNA, CENPT, ARAP3, NCOR1, UBA52	119	2596	12782	1.3654	0.999987	0.321786	44.9669
GOTERM_CC_FAT	GO:0043228~non-membrane-bounded organelle	33	22.9167	0.0451008	ABCF1, XRCC6, AURKA, AURKB, FOS, CIR1, KRT8, FGF1, CCNA1, MYC, SCNN1A, APEX1, GEMIN4, BGLAP, MYOZ1, CDC20, MCM2, RPS6, RACGAP1, HNRNPA1, MIS12, ARHGEF11, MAD2L1, TNS1, KRT18, NEDD4, KRIT1, PSMA3, PCNA, CENPT, ARAP3, NCOR1, UBA52	119	2596	12782	1.3654	0.999987	0.321786	44.9669
GOTERM_CC_FAT	GO:0070419~nonhomologous end joining complex	2	1.38889	0.0453212	XRCC6, PRKDC	119	5	12782	42.9647	0.999988	0.314239	45.131
GOTERM_CC_FAT	GO:0005958~DNA-dependent protein kinase-DNA ligase 4 complex	2	1.38889	0.0453212	XRCC6, PRKDC	119	5	12782	42.9647	0.999988	0.314239	45.131
GOTERM_MF_FAT	GO:0019904~protein domain specific binding	8	5.55556	0.0454656	KHDRBS1, HSP90AA1, TCAP, NEDD4, SCNN1A, NCOR1, NLRP1, SRC	129	331	12983	2.43247	1	0.656071	47.3176
GOTERM_BP_FAT	GO:0045639~positive regulation of myeloid cell differentiation	3	2.08333	0.0455598	STAT5A, GNAS, RUNX1	141	33	13528	8.72211	1	0.394029	53.676
GOTERM_MF_FAT	GO:0019887~protein kinase regulator activity	4	2.77778	0.0458244	CCND1, PRKAR2A, SOCS3, SPA17	129	81	12983	4.97004	1	0.636746	47.5897
GOTERM_BP_FAT	GO:0051603~proteolysis involved in cellular protein catabolic process	12	8.33333	0.0469648	MAD2L1, NEDD4, SOCS3, USP5, PSMA3, PSMD2, UBE2L6, CDC20, NEDD4L, UBE2D1, FEM1B, UBA52	141	600	13528	1.91887	1	0.401221	54.7886
GOTERM_BP_FAT	GO:0034622~cellular macromolecular complex assembly	8	5.55556	0.0473515	HSP90AA1, TCAP, DICER1, MCM2, MIS12, SRC, GEMIN4, TXNL4A	141	318	13528	2.41367	1	0.4015	55.0903
GOTERM_MF_FAT	GO:0008047~enzyme activator activity	8	5.55556	0.0479508	PLAA, CXCL1, PPP2R4, ARAP3, ITSN1, RACGAP1, NLRP1, ARHGEF11	129	335	12983	2.40342	1	0.632812	49.1757
GOTERM_BP_FAT	GO:0050806~positive regulation of synaptic transmission	3	2.08333	0.0480864	KISS1R, UBA52, LTA	141	34	13528	8.46558	1	0.404071	55.6587
GOTERM_MF_FAT	GO:0030235~nitric-oxide synthase regulator activity	2	1.38889	0.0483401	HSP90AA1, ESR1	129	5	12983	40.2574	1	0.615976	49.4611
GOTERM_BP_FAT	GO:0044257~cellular protein catabolic process	12	8.33333	0.0483679	MAD2L1, NEDD4, SOCS3, USP5, PSMA3, PSMD2, UBE2L6, CDC20, NEDD4L, UBE2D1, FEM1B, UBA52	141	603	13528	1.90932	1	0.40364	55.8746
GOTERM_BP_FAT	GO:0051960~regulation of nervous system development	6	4.16667	0.0492812	NTF3, EFNA1, XRCC6, SEMA4D, BMP7, UBA52	141	192	13528	2.99823	1	0.407305	56.5682
GOTERM_BP_FAT	GO:0050804~regulation of synaptic transmission	5	3.47222	0.052779	KISS1R, NTF4, NTF3, UBA52, LTA	141	136	13528	3.52733	1	0.427166	59.1313
GOTERM_BP_FAT	GO:0006417~regulation of translation	5	3.47222	0.0539492	EIF4A3, EIF4EBP1, EIF3B, RBM8A, MAGOH	141	137	13528	3.50158	1	0.432072	59.9565
GOTERM_BP_FAT	GO:0006952~defense response	12	8.33333	0.0542667	PLAA, ABCF1, CXCL1, FOS, C4A, PENK, SFTPD, C4BPB, HLA-C, CXCR2, DEFB1, NLRP1	141	615	13528	1.87206	1	0.431708	60.1777
GOTERM_CC_FAT	GO:0000118~histone deacetylase complex	3	2.08333	0.054868	SAP30, CIR1, NCOR1	119	41	12782	7.8594	0.999999	0.35864	51.8229
GOTERM_MF_FAT	GO:0046982~protein heterodimerization activity	6	4.16667	0.0549393	FOS, SUCLG1, PPP2R4, RUNX1, USF1, RRAGC	129	208	12983	2.90318	1	0.645444	54.08
GOTERM_BP_FAT	GO:0010647~positive regulation of cell communication	8	5.55556	0.0549483	KISS1R, NEDD4, ESR1, ITSN1, BMP7, UBA52, SRC, LTA	141	329	13528	2.33297	1	0.433548	60.6487
GOTERM_BP_FAT	GO:0009416~response to light stimulus	5	3.47222	0.0551313	FOS, CCND1, NEDD4, USF1, FEN1	141	138	13528	3.47621	1	0.432375	60.7743
GOTERM_BP_FAT	GO:0051971~positive regulation of transmission of nerve impulse	3	2.08333	0.0559608	KISS1R, UBA52, LTA	141	37	13528	7.77918	1	0.435064	61.3387
GOTERM_BP_FAT	GO:0019722~calcium-mediated signaling	3	2.08333	0.0559608	KISS1R, LTA, BTK	141	37	13528	7.77918	1	0.435064	61.3387
GOTERM_BP_FAT	GO:0006412~translation	8	5.55556	0.056407	ABCF1, EIF3B, EIF3G, AIMP2, EIF3F, EPRS, RPS6, UBA52	141	331	13528	2.31887	1	0.435454	61.6392
GOTERM_MF_FAT	GO:0004842~ubiquitin-protein ligase activity	5	3.47222	0.0574721	NEDD4, UBE2L6, NEDD4L, UBE2D1, FEM1B	129	147	12983	3.42325	1	0.644564	55.7463
GOTERM_BP_FAT	GO:0010558~negative regulation of macromolecule biosynthetic process	11	7.63889	0.0576552	KHDRBS1, EIF4A3, SAP30, EIF4EBP1, CIR1, NEDD4, SFTPD, DNMT1, NFIC, NCOR1, CDT1	141	547	13528	1.92939	1	0.440513	62.468
GOTERM_BP_FAT	GO:0030163~protein catabolic process	12	8.33333	0.0579227	MAD2L1, NEDD4, SOCS3, USP5, PSMA3, PSMD2, UBE2L6, CDC20, NEDD4L, UBE2D1, FEM1B, UBA52	141	622	13528	1.851	1	0.43983	62.6435
GOTERM_MF_FAT	GO:0003713~transcription coactivator activity	6	4.16667	0.0605989	MMS19, BGLAP, NFKB2, APEX1, CBFB, ATF2	129	214	12983	2.82178	1	0.647543	57.7261
GOTERM_BP_FAT	GO:0031646~positive regulation of neurological system process	3	2.08333	0.0614432	KISS1R, UBA52, LTA	141	39	13528	7.38025	1	0.457565	64.8817
GOTERM_BP_FAT	GO:0060284~regulation of cell development	6	4.16667	0.0618455	NTF3, EFNA1, XRCC6, SEMA4D, BMP7, UBA52	141	205	13528	2.8081	1	0.457552	65.1293
GOTERM_CC_FAT	GO:0005694~chromosome	9	6.25	0.0627378	BGLAP, MAD2L1, NEDD4, XRCC6, PCNA, CENPT, MCM2, AURKB, MIS12	119	460	12782	2.10153	1	0.389844	56.7639
GOTERM_BP_FAT	GO:0006916~anti-apoptosis	6	4.16667	0.0628808	SOCS3, STAT5A, ESR1, SEMA4D, MYC, UBA52	141	206	13528	2.79446	1	0.461014	65.7589
GOTERM_BP_FAT	GO:0034613~cellular protein localization	9	6.25	0.0636637	COPB2, KRT18, NEDD4, COPB1, AKAP5, PCNA, TOMM40, AURKB, CDC37	141	411	13528	2.10095	1	0.463048	66.2279
GOTERM_BP_FAT	GO:0042127~regulation of cell proliferation	14	9.72222	0.0640775	CXCL1, STS, STAT5A, PTH1R, CXCR2, PIN1, CCND1, KISS1R, SFTPD, FGF1, BMP7, MYC, CCNA2, LTA	141	787	13528	1.70674	1	0.463065	66.4734
GOTERM_MF_FAT	GO:0030674~protein binding, bridging	4	2.77778	0.0657602	KHDRBS1, MMS19, GRB10, SRC	129	94	12983	4.2827	1	0.662232	60.8152
GOTERM_BP_FAT	GO:0070727~cellular macromolecule localization	9	6.25	0.0658323	COPB2, KRT18, NEDD4, COPB1, AKAP5, PCNA, TOMM40, AURKB, CDC37	141	414	13528	2.08572	1	0.470221	67.4958
GOTERM_MF_FAT	GO:0001883~purine nucleoside binding	23	15.9722	0.065975	ABCF1, HSP90AA1, SUCLG1, DICER1, XRCC6, PRKDC, EPRS, AURKA, MCM2, AURKB, CHEK2, PRKCE, NLRP1, SRC, RRAGC, BTK, TP53RK, EIF4A3, EPHA4, PRKAR2A, PPP2R4, UBE2D1, RUNX1	129	1601	12983	1.44585	1	0.647847	60.9391
GOTERM_BP_FAT	GO:0031327~negative regulation of cellular biosynthetic process	11	7.63889	0.0659924	KHDRBS1, EIF4A3, SAP30, EIF4EBP1, CIR1, NEDD4, SFTPD, DNMT1, NFIC, NCOR1, CDT1	141	561	13528	1.88124	1	0.468861	67.5876
GOTERM_BP_FAT	GO:0051969~regulation of transmission of nerve impulse	5	3.47222	0.0660838	KISS1R, NTF4, NTF3, UBA52, LTA	141	147	13528	3.26338	1	0.467154	67.6399
GOTERM_BP_FAT	GO:0043523~regulation of neuron apoptosis	4	2.77778	0.06656	NTF3, ESR1, ITSN1, LTA	141	90	13528	4.26414	1	0.467476	67.9111
GOTERM_MF_FAT	GO:0017080~sodium channel regulator activity	2	1.38889	0.0670204	NEDD4, NEDD4L	129	7	12983	28.7553	1	0.63882	61.537
GOTERM_BP_FAT	GO:0000910~cytokinesis	3	2.08333	0.0671005	AURKB, RACGAP1, ARHGEF11	141	41	13528	7.02024	1	0.468129	68.2163
GOTERM_BP_FAT	GO:0016477~cell migration	7	4.86111	0.0671044	TNS1, PRSS3, SFTPD, LRP6, PRKDC, CXCR2, SRC	141	276	13528	2.43334	1	0.466006	68.2185
GOTERM_BP_FAT	GO:0002520~immune system development	7	4.86111	0.0671044	STAT5A, XRCC6, PRKDC, NFKB2, RUNX1, CBFB, LTA	141	276	13528	2.43334	1	0.466006	68.2185
GOTERM_CC_FAT	GO:0015630~microtubule cytoskeleton	10	6.94444	0.0673643	MAD2L1, KRT18, CDC20, AURKA, AURKB, CCNA1, RACGAP1, APEX1, MYC, NCOR1	119	549	12782	1.9565	1	0.402892	59.4459
GOTERM_BP_FAT	GO:0043086~negative regulation of catalytic activity	7	4.86111	0.0680337	MAD2L1, PSMA3, PSMD2, PPP2R4, CDC20, UBE2D1, UBA52	141	277	13528	2.42456	1	0.468655	68.737
GOTERM_MF_FAT	GO:0003677~DNA binding	31	21.5278	0.0691092	LMO1, STAT5A, XRCC6, PRKDC, NFKB2, XRCC1, CBFB, CDT1, ATF2, FOS, CIR1, PHTF1, RUNX1, MYB, MYC, APEX1, FEN1, PITX2, KHDRBS1, CEBPD, RUNX1T1, ESR1, MCM2, USF1, HNRNPA1, GTF2I, PCNA, DNMT1, CENPT, NFIC, NCOR1	129	2331	12983	1.33846	1	0.63609	62.7062
GOTERM_BP_FAT	GO:0001649~osteoblast differentiation	3	2.08333	0.0699917	BGLAP, PTH1R, CBFB	141	42	13528	6.85309	1	0.47645	69.8034
GOTERM_MF_FAT	GO:0001882~nucleoside binding	23	15.9722	0.0700125	ABCF1, HSP90AA1, SUCLG1, DICER1, XRCC6, PRKDC, EPRS, AURKA, MCM2, AURKB, CHEK2, PRKCE, NLRP1, SRC, RRAGC, BTK, TP53RK, EIF4A3, EPHA4, PRKAR2A, PPP2R4, UBE2D1, RUNX1	129	1612	12983	1.43598	1	0.62716	63.2016
GOTERM_BP_FAT	GO:0000012~single strand break repair	2	1.38889	0.0702467	APLF, XRCC1	141	7	13528	27.4124	1	0.475605	69.9398
GOTERM_MF_FAT	GO:0000166~nucleotide binding	30	20.8333	0.0708924	ABCF1, APLF, U2AF2, DICER1, XRCC6, PRKDC, AURKA, AURKB, CHEK2, SRC, RRAGC, BTK, PRKAR2A, EIF3B, EIF3G, RBM8A, UBE2D1, RUNX1, HSP90AA1, SUCLG1, EPRS, MCM2, PRKCE, HNRNPA1, NLRP1, TP53RK, EIF4A3, EPHA4, GNAS, PPP2R4	129	2245	12983	1.3449	1	0.618551	63.6782
GOTERM_BP_FAT	GO:0016310~phosphorylation	14	9.72222	0.0709362	EFNA1, STAT5A, PRKDC, AURKA, CHEK2, AURKB, PRKCE, SRC, BTK, TP53RK, EPHA4, CCND1, KISS1R, BMP7	141	800	13528	1.67901	1	0.476927	70.3055
GOTERM_MF_FAT	GO:0008135~translation factor activity, nucleic acid binding	4	2.77778	0.0725748	ABCF1, EIF3B, EIF3G, EIF3F	129	98	12983	4.10789	1	0.614602	64.5737
GOTERM_BP_FAT	GO:0007093~mitotic cell cycle checkpoint	3	2.08333	0.0729232	CCND1, MAD2L1, CCNA2	141	43	13528	6.69372	1	0.48458	71.3364
GOTERM_BP_FAT	GO:0009890~negative regulation of biosynthetic process	11	7.63889	0.0737293	KHDRBS1, EIF4A3, SAP30, EIF4EBP1, CIR1, NEDD4, SFTPD, DNMT1, NFIC, NCOR1, CDT1	141	573	13528	1.84184	1	0.486382	71.7449
GOTERM_BP_FAT	GO:0010551~regulation of specific transcription from RNA polymerase II promoter	4	2.77778	0.0737619	XRCC6, PRKDC, USF1, NCOR1	141	94	13528	4.08269	1	0.484448	71.7613
GOTERM_BP_FAT	GO:0031644~regulation of neurological system process	5	3.47222	0.0744386	KISS1R, NTF4, NTF3, UBA52, LTA	141	153	13528	3.1354	1	0.485615	72.0998
GOTERM_MF_FAT	GO:0008083~growth factor activity	5	3.47222	0.0749117	CXCL1, NTF4, NTF3, BMP7, FGF1	129	161	12983	3.12557	1	0.614249	65.7836
GOTERM_BP_FAT	GO:0043066~negative regulation of apoptosis	8	5.55556	0.0749189	KRT18, SOCS3, STAT5A, ESR1, SEMA4D, ITSN1, MYC, UBA52	141	354	13528	2.16821	1	0.485835	72.3378
GOTERM_MF_FAT	GO:0004519~endonuclease activity	4	2.77778	0.0760963	APLF, DICER1, APEX1, FEN1	129	100	12983	4.02574	1	0.6082	66.3822
GOTERM_MF_FAT	GO:0004523~ribonuclease H activity	2	1.38889	0.0762236	APEX1, FEN1	129	8	12983	25.1609	1	0.597195	66.4459
GOTERM_MF_FAT	GO:0046875~ephrin receptor binding	2	1.38889	0.0762236	EFNA1, EFNB2	129	8	12983	25.1609	1	0.597195	66.4459
GOTERM_MF_FAT	GO:0004672~protein kinase activity	11	7.63889	0.0762681	TP53RK, EPHA4, CCND1, EFNA3, PRKDC, AURKA, AURKB, CHEK2, PRKCE, SRC, BTK	129	606	12983	1.82686	1	0.586163	66.4681
GOTERM_MF_FAT	GO:0043565~sequence-specific DNA binding	11	7.63889	0.0769202	FOS, CEBPD, XRCC6, ESR1, CENPT, MCM2, USF1, MYC, NCOR1, ATF2, PITX2	129	607	12983	1.82385	1	0.578509	66.7927
GOTERM_BP_FAT	GO:0034621~cellular macromolecular complex subunit organization	8	5.55556	0.0775702	HSP90AA1, TCAP, DICER1, MCM2, MIS12, SRC, GEMIN4, TXNL4A	141	357	13528	2.14999	1	0.496211	73.6174
GOTERM_BP_FAT	GO:0001775~cell activation	7	4.86111	0.0777399	STAT5A, KLRK1, PRKDC, CXCR2, NFKB2, CBFB, LTA	141	287	13528	2.34008	1	0.494936	73.6974
GOTERM_MF_FAT	GO:0004521~endoribonuclease activity	3	2.08333	0.0782377	DICER1, APEX1, FEN1	129	47	12983	6.42405	1	0.574397	67.4396
GOTERM_BP_FAT	GO:0046907~intracellular transport	12	8.33333	0.0786541	COPB2, KRT18, HSP90AA1, NEDD4, COPB1, SMG7, AKAP5, PCNA, TOMM40, GNAS, HNRNPA1, CDC37	141	657	13528	1.75239	1	0.497093	74.1244
GOTERM_BP_FAT	GO:0006413~translational initiation	3	2.08333	0.0789023	EIF3B, EIF3G, EIF3F	141	45	13528	6.39622	1	0.496189	74.2392
GOTERM_BP_FAT	GO:0043069~negative regulation of programmed cell death	8	5.55556	0.0793681	KRT18, SOCS3, STAT5A, ESR1, SEMA4D, ITSN1, MYC, UBA52	141	359	13528	2.13801	1	0.496282	74.4533
GOTERM_BP_FAT	GO:0060548~negative regulation of cell death	8	5.55556	0.0802761	KRT18, SOCS3, STAT5A, ESR1, SEMA4D, ITSN1, MYC, UBA52	141	360	13528	2.13207	1	0.498368	74.866
GOTERM_MF_FAT	GO:0019787~small conjugating protein ligase activity	5	3.47222	0.0817214	NEDD4, UBE2L6, NEDD4L, UBE2D1, FEM1B	129	166	12983	3.03143	1	0.58068	69.0942
GOTERM_MF_FAT	GO:0004713~protein tyrosine kinase activity	5	3.47222	0.0817214	TP53RK, EPHA4, EFNA3, SRC, BTK	129	166	12983	3.03143	1	0.58068	69.0942
GOTERM_BP_FAT	GO:0018108~peptidyl-tyrosine phosphorylation	3	2.08333	0.0819477	STAT5A, SRC, BTK	141	46	13528	6.25717	1	0.503817	75.6093
GOTERM_BP_FAT	GO:0007010~cytoskeleton organization	9	6.25	0.0831336	CXCL1, TCAP, KRT8, MYOZ1, AURKA, ARAP3, RACGAP1, NCOR1, ARHGEF11	141	436	13528	1.98048	1	0.507035	76.124
GOTERM_MF_FAT	GO:0005070~SH3/SH2 adaptor activity	3	2.08333	0.0840544	KHDRBS1, GRB10, SRC	129	49	12983	6.16184	1	0.58141	70.1583
GOTERM_MF_FAT	GO:0051721~protein phosphatase 2A binding	2	1.38889	0.0853368	SMG7, PPP2R4	129	9	12983	22.3652	1	0.577463	70.7286
GOTERM_MF_FAT	GO:0003906~DNA-(apurinic or apyrimidinic site) lyase activity	2	1.38889	0.0853368	APLF, APEX1	129	9	12983	22.3652	1	0.577463	70.7286
GOTERM_BP_FAT	GO:0000077~DNA damage checkpoint	3	2.08333	0.0881448	CCND1, CHEK2, CCNA2	141	48	13528	5.99645	1	0.526538	78.1887
GOTERM_BP_FAT	GO:0018212~peptidyl-tyrosine modification	3	2.08333	0.0881448	STAT5A, SRC, BTK	141	48	13528	5.99645	1	0.526538	78.1887
GOTERM_BP_FAT	GO:0046325~negative regulation of glucose import	2	1.38889	0.0894016	GRB10, LTA	141	9	13528	21.3207	1	0.529777	78.6795
GOTERM_BP_FAT	GO:0006105~succinate metabolic process	2	1.38889	0.0894016	SUCLG1, STAT5A	141	9	13528	21.3207	1	0.529777	78.6795
GOTERM_BP_FAT	GO:0007243~protein kinase cascade	8	5.55556	0.0896894	CCM2, KISS1R, SOCS3, EFNA1, STAT5A, FGF1, SRC, BTK	141	370	13528	2.07445	1	0.528962	78.7904
GOTERM_BP_FAT	GO:0007178~transmembrane receptor protein serine/threonine kinase signaling pathway	4	2.77778	0.0911599	FOS, UBE2D1, BMP7, AKAP3	141	103	13528	3.72595	1	0.533019	79.3488
GOTERM_BP_FAT	GO:0006886~intracellular protein transport	8	5.55556	0.0936234	COPB2, KRT18, NEDD4, COPB1, AKAP5, PCNA, TOMM40, CDC37	141	374	13528	2.05226	1	0.541005	80.2534
GOTERM_BP_FAT	GO:0050767~regulation of neurogenesis	5	3.47222	0.0936643	NTF3, EFNA1, XRCC6, SEMA4D, BMP7	141	166	13528	2.88986	1	0.539178	80.2681
GOTERM_MF_FAT	GO:0005198~structural molecule activity	11	7.63889	0.095855	MMS19, COPB2, BGLAP, BGN, EIF3B, KRT18, TCAP, COPB1, KRT8, RPS6, UBA52	129	634	12983	1.74618	1	0.612573	75.0392
GOTERM_MF_FAT	GO:0004527~exonuclease activity	3	2.08333	0.0960629	APLF, APEX1, FEN1	129	53	12983	5.6968	1	0.604116	75.1181
GOTERM_CC_FAT	GO:0030126~COPI vesicle coat	2	1.38889	0.0970254	COPB2, COPB1	119	11	12782	19.5294	1	0.519264	73.3078
GOTERM_CC_FAT	GO:0000307~cyclin-dependent protein kinase holoenzyme complex	2	1.38889	0.0970254	CCND1, PCNA	119	11	12782	19.5294	1	0.519264	73.3078
GOTERM_MF_FAT	GO:0032559~adenyl ribonucleotide binding	21	14.5833	0.0971426	ABCF1, HSP90AA1, DICER1, XRCC6, PRKDC, EPRS, AURKA, MCM2, AURKB, CHEK2, PRKCE, NLRP1, SRC, BTK, TP53RK, EIF4A3, EPHA4, PRKAR2A, PPP2R4, UBE2D1, RUNX1	129	1497	12983	1.41183	1	0.599376	75.5244
GOTERM_BP_FAT	GO:0060249~anatomical structure homeostasis	4	2.77778	0.0973069	XRCC6, PTH1R, SFTPD, PRKDC	141	106	13528	3.6205	1	0.551575	81.5368
GOTERM_BP_FAT	GO:0010829~negative regulation of glucose transport	2	1.38889	0.0988316	GRB10, LTA	141	10	13528	19.1887	1	0.555488	82.0447
GOTERM_BP_FAT	GO:0033209~tumor necrosis factor-mediated signaling pathway	2	1.38889	0.0988316	KRT18, KRT8	141	10	13528	19.1887	1	0.555488	82.0447
GOTERM_BP_FAT	GO:0048205~COPI coating of Golgi vesicle	2	1.38889	0.0988316	COPB2, COPB1	141	10	13528	19.1887	1	0.555488	82.0447
GOTERM_BP_FAT	GO:0048200~Golgi transport vesicle coating	2	1.38889	0.0988316	COPB2, COPB1	141	10	13528	19.1887	1	0.555488	82.0447
GOTERM_BP_FAT	GO:0033151~V(D)J recombination	2	1.38889	0.0988316	XRCC6, PRKDC	141	10	13528	19.1887	1	0.555488	82.0447
GOTERM_BP_FAT	GO:0006303~double-strand break repair via nonhomologous end joining	2	1.38889	0.0988316	XRCC6, PRKDC	141	10	13528	19.1887	1	0.555488	82.0447
GOTERM_BP_FAT	GO:0048194~Golgi vesicle budding	2	1.38889	0.0988316	COPB2, COPB1	141	10	13528	19.1887	1	0.555488	82.0447
GOTERM_BP_FAT	GO:0051674~localization of cell	7	4.86111	0.0993792	TNS1, PRSS3, SFTPD, LRP6, PRKDC, CXCR2, SRC	141	307	13528	2.18763	1	0.555612	82.224
GOTERM_BP_FAT	GO:0048870~cell motility	7	4.86111	0.0993792	TNS1, PRSS3, SFTPD, LRP6, PRKDC, CXCR2, SRC	141	307	13528	2.18763	1	0.555612	82.224
GOTERM_BP_FAT	GO:0007411~axon guidance	4	2.77778	0.0993927	EPHA4, NTF3, BMP7, UBA52	141	107	13528	3.58666	1	0.5537	82.2283
